# Supplementary material for: Proteome Analyses of Soil Bacteria Grown in the Presence of Potato Suberin, a Recalcitrant Biopolymer
Source: PubMed Central journal article supplement (PMC5158114; doi:10.1264/jsme2.me15195), 2016-10-28
Supplement: 31_418_s1.pdf [file 31_418_s1.pdf]

**Table S1** Proteins with predicted extracellular localization produced by soil bacterial community during growth in minimal medium supplemented with suberin, from 5 to 60 days

| UniProt or UniRef accession number                 | Bacterial species                  | Putative function                    | Abundance (NSpC) |      |      |      |      |
|----------------------------------------------------|------------------------------------|--------------------------------------|------------------|------|------|------|------|
|                                                    |                                    |                                      | 5 d              | 10 d | 20 d | 30 d | 60 d |
| <b>Amino acid metabolism</b>                       |                                    |                                      |                  |      |      |      |      |
| A3KZ66 <sup>a,b</sup>                              | <i>Pseudomonas</i> spp.            | Pvds-regulated endoprotease          | - <sup>c</sup>   | 0.67 | 0.80 | 0.73 | -    |
| C3K3P0 <sup>b</sup>                                | <i>Pseudomonas</i> spp.            | dihydroxy-acid dehydratase           | 0.03             | -    | -    | -    | -    |
| C3K6V7 <sup>b</sup>                                | <i>Pseudomonas</i> spp.            | protease                             | 0.15             | -    | -    | -    | -    |
| C3K907                                             | <i>Pseudomonas fluorescens</i>     | protease                             | 0.08             | -    | -    | -    | -    |
| E1T7C4                                             | <i>Burkholderia</i> sp.            | ArgE, acetylornithine deacetylase    | -                | 0.04 | -    | -    | -    |
| F2LE35                                             | <i>Burkholderia gladioli</i>       | protease                             | -                | 0.12 | -    | -    | -    |
| J2YKE9                                             | <i>Pseudomonas</i> sp.             | dipeptidase                          | 0.06             | -    | -    | -    | -    |
| P34816                                             | <i>Pseudomonas syringae</i>        | tryptophan synthase                  | 0.11             | -    | -    | -    | -    |
| <b>Carbohydrate metabolism</b>                     |                                    |                                      |                  |      |      |      |      |
| A3ML77 <sup>a,b</sup>                              | <i>Burkholderia</i> spp.           | enolase                              | -                | 0.11 | -    | -    | -    |
| C3K517                                             | <i>Pseudomonas fluorescens</i>     | malate:quinone oxidoreductase        | 0.03             | -    | -    | -    | -    |
| C9ZE95                                             | <i>Streptomyces scabiei</i>        | xylanase A                           | -                | -    | 0.08 | -    | -    |
| UPI000289064F                                      | <i>Pseudomonas</i> sp.             | malic enzyme                         | 0.29             | 0.09 | -    | -    | -    |
| <b>Cell wall, membrane and envelope biogenesis</b> |                                    |                                      |                  |      |      |      |      |
| A6BTB9 <sup>a,b</sup>                              | <i>Yersinia</i> spp.               | peptidoglycan-associated lipoprotein | 0.22             | -    | -    | -    | -    |
| A8F2R2 <sup>b</sup>                                | <i>Rickettsia</i> spp.             | peptidoglycan-associated lipoprotein | -                | -    | -    | 0.11 | 0.33 |
| A9W4H1 <sup>b</sup>                                | <i>Methylobacterium</i> spp.       | BamA                                 | -                | -    | -    | -    | 0.03 |
| A9Z1A5                                             | <i>Acinetobacter baumannii</i>     | outer membrane protein A             | 0.19             | -    | -    | -    | -    |
| B1FWC4 <sup>b</sup>                                | <i>Burkholderia</i> spp.           | peptidoglycan-associated lipoprotein | -                | 0.53 | -    | -    | -    |
| B2JGA1 <sup>b</sup>                                | <i>Burkholderia</i> spp.           | peptidoglycan-associated lipoprotein | -                | 0.61 | -    | -    | -    |
| C3JYS2 <sup>b</sup>                                | <i>Pseudomonas</i> spp.            | TolB                                 | 0.13             | 0.04 | -    | -    | -    |
| C3K1L1                                             | <i>Pseudomonas fluorescens</i>     | BamB                                 | 0.20             | -    | -    | -    | -    |
| C3K324                                             | <i>Pseudomonas fluorescens</i>     | LptD                                 | 0.05             | -    | -    | -    | -    |
| C3K8X8 <sup>b</sup>                                | <i>Pseudomonas</i> spp.            | OmpA family-lipoprotein              | 0.33             | -    | -    | -    | -    |
| C3KDM6 <sup>b</sup>                                | <i>Pseudomonas</i> spp.            | phosphatidylserine decarboxylase     | 0.06             | -    | -    | -    | -    |
| E2XZ64                                             | <i>Pseudomonas fluorescens</i>     | SurA                                 | 0.06             | -    | -    | -    | -    |
| G8M7G2                                             | <i>Burkholderia</i> sp.            | TolB                                 | -                | 0.16 | -    | -    | -    |
| J0YEJ9 <sup>b</sup>                                | <i>Pseudomonas</i> spp.            | peptidoglycan-associated lipoprotein | 2.11             | 1.11 | -    | -    | -    |
| J2M1D5 <sup>b</sup>                                | <i>Pseudomonas</i> spp.            | outer membrane protein H1            | 0.10             | -    | -    | -    | -    |
| L7HFX4 <sup>b</sup>                                | <i>Pseudomonas</i> spp.            | BamD                                 | 0.10             | -    | -    | -    | -    |
| O85417                                             | <i>Pseudomonas caricapapayae</i>   | outer membrane lipoprotein I         | -                | -    | -    | 0.56 | -    |
| UPI00028991C8                                      | <i>Pseudomonas extremaustralis</i> | flagellin                            | 0.78             | -    | -    | -    | -    |

**Energy production and conversion**

|                     |                                |                                              |      |      |   |   |   |
|---------------------|--------------------------------|----------------------------------------------|------|------|---|---|---|
| B1FT18 <sup>b</sup> | <i>Burkholderia</i> spp.       | PQQ-dependent dehydrogenase                  | -    | 0.12 | - | - | - |
| B1FV46 <sup>b</sup> | <i>Burkholderia</i> spp.       | malate dehydrogenase                         | -    | 0.34 | - | - | - |
| C3K121 <sup>b</sup> | <i>Pseudomonas</i> spp.        | phosphoenolpyruvate synthase                 | 0.11 | -    | - | - | - |
| C3K1E7 <sup>b</sup> | <i>Pseudomonas</i> spp.        | ATP synthase, gamma chain                    | 0.13 | -    | - | - | - |
| C3K6M5 <sup>b</sup> | <i>Pseudomonas</i> spp.        | succinate dehydrogenase flavoprotein subunit | 0.09 | -    | - | - | - |
| C3KBL8              | <i>Pseudomonas fluorescens</i> | aerobic glycerol-3-phosphate dehydrogenase   | 0.17 | -    | - | - | - |
| C3KCP3              | <i>Pseudomonas fluorescens</i> | acetyltransferase                            | 0.30 | 0.18 | - | - | - |
| C3KE78              | <i>Pseudomonas fluorescens</i> | azurin                                       | 0.31 | -    | - | - | - |
| I2BM47 <sup>b</sup> | <i>Pseudomonas</i> spp.        | electron transfer flavoprotein, beta subunit | 0.46 | 0.08 | - | - | - |
| J1IL09 <sup>b</sup> | <i>Pseudomonas</i> spp.        | UDP-glucose 6-dehydrogenase                  | 0.08 | -    | - | - | - |

**Lipid metabolism and ketogenesis**

|                       |                                  |                                                      |      |      |      |   |      |
|-----------------------|----------------------------------|------------------------------------------------------|------|------|------|---|------|
| A9IIX3 <sup>a,b</sup> | <i>Bordetella</i> spp.           | acetoacetyl-CoA reductase                            | -    | 0.19 | -    | - | -    |
| C3JZ29 <sup>b</sup>   | <i>Pseudomonas</i> spp.          | glycerophosphoryl diester phosphodiesterase          | 0.07 | -    | -    | - | -    |
| C3K743 <sup>b</sup>   | <i>Pseudomonas</i> spp.          | 3-hydroxydecanoyl-[acyl-carrier-protein] dehydratase | 0.16 | -    | -    | - | -    |
| I4WGM2                | <i>Rhodanobacter thiooxydans</i> | lipase                                               | -    | -    | -    | - | 0.11 |
| J0YBC2 <sup>b</sup>   | <i>Pseudomonas</i> spp.          | Yce1-like protein                                    | -    | 0.14 | -    | - | -    |
| Q1CWS1                | <i>Myxococcus xanthus</i>        | lipase                                               | -    | -    | 0.02 | - | -    |

**Replication, transcription, translation and DNA repair**

|                       |                                     |                                 |      |      |   |   |   |
|-----------------------|-------------------------------------|---------------------------------|------|------|---|---|---|
| A2W9A3 <sup>a,b</sup> | <i>Burkholderia</i> spp.            | elongation factor Ts            | -    | 0.10 | - | - | - |
| A4SUU7 <sup>a,b</sup> | <i>Polynucleobacter necessarius</i> | elongation factor Tu            | -    | 0.35 | - | - | - |
| A4VHN7 <sup>a,b</sup> | <i>Pseudomonas</i> spp.             | 50S ribosomal protein L16       | 0.27 | -    | - | - | - |
| A4VHP0 <sup>a,b</sup> | <i>Pseudomonas</i> spp.             | 50S ribosomal protein L14       | 0.15 | -    | - | - | - |
| A5VXR4 <sup>b</sup>   | <i>Pseudomonas</i> spp.             | 30S ribosomal protein S5        | 0.61 | 0.17 | - | - | - |
| A9ADK4 <sup>a,b</sup> | <i>Burkholderia</i> spp.            | 50S ribosomal protein L24       | -    | 0.27 | - | - | - |
| B2JHS8 <sup>b</sup>   | <i>Burkholderia</i> spp.            | LacI, transcriptional regulator | -    | 0.17 | - | - | - |
| B2T724 <sup>b</sup>   | <i>Burkholderia</i> spp.            | 50S ribosomal protein L17       | -    | 0.13 | - | - | - |
| B2T750 <sup>b</sup>   | <i>Burkholderia</i> spp.            | 50S ribosomal protein L4        | -    | 0.17 | - | - | - |
| C1DKN6 <sup>b</sup>   | <i>Pseudomonas</i> spp.             | 30S ribosomal protein S11       | 0.43 | -    | - | - | - |
| C3JXX2 <sup>b</sup>   | <i>Pseudomonas</i> spp.             | ATP-dependent RNA helicase      | 0.06 | -    | - | - | - |
| C3K2V7 <sup>b</sup>   | <i>Pseudomonas</i> spp.             | 50S ribosomal protein L15       | 0.33 | -    | - | - | - |
| C3K3H0 <sup>b</sup>   | <i>Pseudomonas</i> spp.             | RNA helicase                    | 0.03 | -    | - | - | - |
| C3KC10                | <i>Pseudomonas fluorescens</i>      | LemA, virulence regulator       | 0.22 | -    | - | - | - |
| C3KCS0                | <i>Pseudomonas fluorescens</i>      | 50S ribosomal protein L25       | 0.18 | -    | - | - | - |
| C3KE70 <sup>b</sup>   | <i>Pseudomonas</i> spp.             | 50S ribosomal protein L9        | 0.27 | 0.20 | - | - | - |
| C5A9H1                | <i>Burkholderia glumae</i>          | 30S ribosomal protein S14       | -    | 0.50 | - | - | - |

|                                        |                                       |                                                |      |      |      |      |      |
|----------------------------------------|---------------------------------------|------------------------------------------------|------|------|------|------|------|
| E2XL76 <sup>b</sup>                    | <i>Pseudomonas</i> spp.               | GTP-binding protein                            | 0.08 | -    | -    | -    | -    |
| E7PK79                                 | <i>Pseudomonas syringae</i>           | 30S ribosomal protein S9                       | 0.27 | -    | -    | -    | -    |
| I2BR39                                 | <i>Pseudomonas fluorescens</i>        | ribosomal protein L25                          | 0.33 | -    | -    | -    | -    |
| K8R288                                 | <i>Burkholderia</i> sp.               | transcription accessory protein                | -    | 0.08 | -    | -    | -    |
| <b>Stress and defense mechanisms</b>   |                                       |                                                |      |      |      |      |      |
| A0K6C2 <sup>a,b</sup>                  | <i>Burkholderia</i> spp.              | FtsH, metalloprotease                          | -    | 0.04 | -    | -    | -    |
| C3K1W9 <sup>b</sup>                    | <i>Pseudomonas</i> spp.               | thioredoxin reductase                          | 0.21 | -    | -    | -    | -    |
| C3K275                                 | <i>Pseudomonas fluorescens</i>        | DnaK                                           | 0.20 | 0.07 | -    | -    | -    |
| C3KB07 <sup>b</sup>                    | <i>Pseudomonas</i> spp.               | peroxidase                                     | 0.08 | -    | -    | -    | -    |
| C3KDG0 <sup>b</sup>                    | <i>Pseudomonas</i> spp.               | RecA                                           | 0.21 | -    | -    | -    | -    |
| E2XRC5                                 | <i>Pseudomonas fluorescens</i>        | thiol peroxidase                               | 0.22 | -    | -    | -    | -    |
| E2XY77                                 | <i>Pseudomonas fluorescens</i>        | hyperosmotically inducible periplasmic protein | 0.71 | -    | -    | -    | -    |
| E2XY89 <sup>b</sup>                    | <i>Pseudomonas</i> spp.               | FtsH, metalloprotease                          | 0.05 | -    | -    | -    | -    |
| I2BQB7 <sup>b</sup>                    | <i>Pseudomonas</i> spp.               | cold-shock DEAD box protein A                  | 0.07 | -    | -    | -    | -    |
| I4L9S5                                 | <i>Pseudomonas synxantha</i>          | DnaK                                           | -    | 0.13 | -    | -    | -    |
| <b>Transport, secretion and efflux</b> |                                       |                                                |      |      |      |      |      |
| A0K2W2 <sup>a,b</sup>                  | <i>Burkholderia</i> spp.              | amino acid/amide ABC transporter               | -    | 0.14 | -    | -    | -    |
| A1TUU8 <sup>a,b</sup>                  | <i>Acidovorax</i> spp.                | monosaccharide ABC transporter                 | -    | 0.15 | -    | -    | -    |
| A1WC85 <sup>a,b</sup>                  | <i>Acidovorax</i> spp.                | porin                                          | -    | -    | -    | 0.17 | 0.25 |
| A2VY88 <sup>a,b</sup>                  | <i>Burkholderia</i> spp.              | cation/multidrug efflux pump                   | -    | 0.02 | -    | -    | -    |
| A5V8N4 <sup>a</sup>                    | <i>Sphingomonas wittichii</i>         | TonB-dependent receptor                        | -    | -    | -    | -    | 0.02 |
| A8GAT7 <sup>a</sup>                    | <i>Serratia proteamaculans</i>        | metal ABC transporter                          | 0.16 | -    | -    | -    | -    |
| A8GB28 <sup>a,b</sup>                  | <i>Serratia</i> spp.                  | amino acid transporter                         | 0.09 | -    | -    | -    | -    |
| A8GCJ4 <sup>a</sup>                    | <i>Serratia proteamaculans</i>        | porin                                          | 0.34 | -    | -    | -    | -    |
| A8GH34 <sup>b</sup>                    | <i>Serratia</i> spp.                  | cationic amino acid ABC transporter            | 0.11 | -    | -    | -    | -    |
| A9VYY1 <sup>b</sup>                    | <i>Methylobacterium</i> spp.          | porin                                          | -    | -    | -    | -    | 0.05 |
| B0KQ05 <sup>b</sup>                    | <i>Pseudomonas</i> spp.               | sulfate ABC transporter                        | 0.24 | -    | -    | -    | -    |
| B1FY32 <sup>b</sup>                    | <i>Burkholderia</i> spp.              | OmpC family porin                              | -    | 0.18 | -    | -    | 0.15 |
| B1G0N8                                 | <i>Burkholderia graminis</i>          | porin                                          | -    | -    | -    | -    | 0.19 |
| B1GB98                                 | <i>Burkholderia graminis</i>          | porin                                          | -    | -    | -    | 0.20 | 0.48 |
| B1LV39                                 | <i>Methylobacterium radiotolerans</i> | porin                                          | -    | -    | -    | -    | 0.10 |
| B1ZFK7 <sup>b</sup>                    | <i>Methylobacterium</i> spp.          | porin                                          | -    | -    | 0.30 | -    | -    |
| B2JH03 <sup>b</sup>                    | <i>Burkholderia</i> spp.              | monosaccharide-transporting ATPase             | -    | 0.26 | -    | -    | -    |
| B2JK19 <sup>b</sup>                    | <i>Burkholderia</i> spp.              | extracellular amino acid-binding receptor      | -    | 1.50 | -    | -    | -    |
| B2JM60                                 | <i>Burkholderia</i> spp.              | porin                                          | -    | -    | -    | -    | 0.08 |
| B2T4D9                                 | <i>Burkholderia phytofirmans</i>      | extracellular amino acid-binding protein       | -    | 0.07 | -    | -    | -    |

|                     |                                         |                                           |      |      |      |      |      |      |
|---------------------|-----------------------------------------|-------------------------------------------|------|------|------|------|------|------|
| B2T6X5              | <i>Burkholderia phytofirmans</i>        | dipeptide-binding protein                 | -    | 0.07 | -    | -    | -    | -    |
| B2U879              | <i>Ralstonia pickettii</i>              | OmpA/MotB domain protein                  | -    | -    | -    | 0.65 | 0.70 | -    |
| B2UDU1              | <i>Ralstonia pickettii</i>              | porin                                     | -    | 0.08 | 0.11 | 1.08 | 1.03 | -    |
| B2UFC4 <sup>b</sup> | <i>Ralstonia</i> spp.                   | porin                                     | -    | -    | -    | 0.27 | 0.23 | -    |
| B5WCV4 <sup>b</sup> | <i>Burkholderia</i> spp.                | amino acid ligand-binding receptor        | -    | 0.10 | -    | -    | -    | -    |
| B5WIR3              | <i>Burkholderia</i> sp.                 | cationic amino acid ABC transporter       | -    | 0.29 | -    | -    | -    | -    |
| B7S235              | <i>unclassified Gammaproteobacteria</i> | TonB-dependent receptor                   | -    | -    | -    | -    | -    | 0.02 |
| C3JXZ7 <sup>b</sup> | <i>Pseudomonas</i> spp.                 | histidine-binding periplasmic protein     | 0.11 | -    | -    | -    | -    | -    |
| C3JYK8              | <i>Pseudomonas fluorescens</i>          | RND efflux transporter                    | -    | 0.17 | -    | -    | -    | -    |
| C3JYX7 <sup>b</sup> | <i>Pseudomonas</i> spp.                 | branched-chain amino acid ABC transporter | 0.07 | -    | -    | -    | -    | -    |
| C3JZ77 <sup>b</sup> | <i>Pseudomonas</i> spp.                 | maltose-binding protein                   | 0.07 | -    | -    | -    | -    | -    |
| C3JZG0              | <i>Pseudomonas fluorescens</i>          | ferric siderophore receptor               | 0.03 | -    | -    | -    | -    | -    |
| C3K0T0              | <i>Pseudomonas fluorescens</i>          | porin A                                   | 3.14 | 0.14 | -    | -    | -    | -    |
| C3K187 <sup>b</sup> | <i>Pseudomonas</i> spp.                 | imelysin                                  | 0.13 | -    | -    | -    | -    | -    |
| C3K1B9              | <i>Pseudomonas fluorescens</i>          | metal ABC transporter                     | 0.28 | -    | -    | -    | -    | -    |
| C3K1N2 <sup>b</sup> | <i>Pseudomonas</i> spp.                 | SecD                                      | 0.04 | -    | -    | -    | -    | -    |
| C3K3C7 <sup>b</sup> | <i>Pseudomonas</i> spp.                 | glycine betaine/L-proline ABC transporter | 0.12 | -    | -    | -    | -    | -    |
| C3K3T8 <sup>b</sup> | <i>Pseudomonas</i> spp.                 | putrescine ABC transporter                | 0.23 | -    | -    | -    | -    | -    |
| C3K3Z3 <sup>b</sup> | <i>Pseudomonas</i> spp.                 | ABC transporter                           | 0.07 | -    | -    | -    | -    | -    |
| C3K5B7              | <i>Pseudomonas fluorescens</i>          | porin                                     | 0.14 | -    | -    | -    | -    | -    |
| C3K5V1              | <i>Pseudomonas fluorescens</i>          | OprE3                                     | 0.40 | -    | -    | -    | -    | -    |
| C3K717 <sup>b</sup> | <i>Pseudomonas</i> spp.                 | amino acid transporter                    | 0.44 | -    | -    | -    | -    | -    |
| C3K7C1 <sup>b</sup> | <i>Pseudomonas</i> spp.                 | SecB                                      | 0.22 | -    | -    | -    | -    | -    |
| C3K7I2              | <i>Pseudomonas fluorescens</i>          | TonB-dependent receptor                   | 0.25 | -    | -    | -    | -    | -    |
| C3K8P0 <sup>b</sup> | <i>Pseudomonas</i> spp.                 | nucleoside-binding protein                | 0.13 | -    | -    | -    | -    | -    |
| C3K8Z6              | <i>Pseudomonas fluorescens</i>          | branched amino acid ABC transporter       | 0.60 | -    | -    | -    | -    | -    |
| C3K914              | <i>Pseudomonas fluorescens</i>          | ABC transporter                           | 0.31 | -    | -    | -    | -    | -    |
| C3KB06              | <i>Pseudomonas fluorescens</i>          | iron transporter                          | 0.53 | -    | -    | -    | -    | -    |
| C3KBL7 <sup>b</sup> | <i>Pseudomonas</i> spp.                 | glutamate/aspartate ABC transporter       | 0.27 | 0.15 | -    | -    | -    | -    |
| C3KBT7 <sup>b</sup> | <i>Pseudomonas</i> spp.                 | sulfate ABC transporter                   | 0.16 | -    | -    | -    | -    | -    |
| C3KDU7 <sup>b</sup> | <i>Pseudomonas</i> spp.                 | ABC transporter                           | 0.38 | -    | -    | -    | -    | -    |
| C3KEB0              | <i>Pseudomonas fluorescens</i>          | amino acid ABC transporter                | 1.08 | -    | -    | -    | -    | -    |
| C3KEC2              | <i>Pseudomonas fluorescens</i>          | OmpA-like                                 | 0.62 | -    | -    | -    | -    | -    |
| D0S6Y6              | <i>Acinetobacter calcoaceticus</i>      | DcaP-like                                 | 0.53 | 0.53 | 0.43 | 0.17 | -    | -    |
| D5H5Q2              | <i>Salinibacter ruber</i>               | TonB-dependent receptor                   | -    | -    | -    | -    | -    | 0.02 |
| D8D960              | <i>Comamonas testosteroni</i>           | OmpA/MotB                                 | -    | -    | 0.61 | 0.43 | -    | -    |
| D8G164              | <i>Oscillatoria</i> sp.                 | TonB receptor                             | -    | -    | -    | -    | -    | 0.06 |

|                       |                                     |                                           |      |      |      |      |      |
|-----------------------|-------------------------------------|-------------------------------------------|------|------|------|------|------|
| D8JEE3 <sup>b</sup>   | <i>Acinetobacter</i> spp.           | porin                                     | -    | 0.11 | 0.11 | -    | -    |
| D8JLF9                | <i>Acinetobacter</i> sp.            | porin                                     | 0.39 | 0.43 | 0.43 | -    | -    |
| D8NXA2                | <i>Ralstonia solanacearum</i>       | porin                                     | -    | -    | -    | 0.72 | 0.74 |
| E2T0T6                | <i>Ralstonia</i> sp.                | porin                                     | -    | -    | 0.05 | 0.44 | 0.51 |
| E2XKC2                | <i>Pseudomonas fluorescens</i>      | type I secretion outer membrane protein   | 0.07 | -    | -    | -    | -    |
| E2XKL7 <sup>b</sup>   | <i>Pseudomonas</i> spp.             | branched-chain amino acid ABC transporter | 0.13 | -    | -    | -    | -    |
| E2XLH2 <sup>b</sup>   | <i>Pseudomonas</i> spp.             | dipeptide ABC transporter                 | 0.05 | -    | -    | -    | -    |
| E2XMS6 <sup>b</sup>   | <i>Pseudomonas</i> spp.             | OmpH                                      | 0.37 | -    | -    | -    | -    |
| E2XN23                | <i>Pseudomonas fluorescens</i>      | type I secretion membrane fusion protein  | 0.12 | -    | -    | -    | -    |
| E2XW23                | <i>Pseudomonas fluorescens</i>      | long-chain fatty acid transporter         | 0.04 | -    | -    | -    | -    |
| E2Y0H8                | <i>Pseudomonas fluorescens</i>      | porin                                     | 0.29 | -    | -    | -    | -    |
| E5C8U6 <sup>b</sup>   | <i>Bacteroides</i> spp.             | TonB-linked outer membrane protein        | -    | -    | -    | -    | 0.02 |
| F0KK22                | <i>Acinetobacter calcoaceticus</i>  | porin D                                   | 0.13 | 0.15 | 0.06 | -    | -    |
| F6KQ92                | <i>Pseudomonas costantinii</i>      | OprF                                      | 0.35 | -    | -    | -    | -    |
| G3A5T6                | <i>Ralstonia syzygii</i>            | OmpA                                      | -    | -    | -    | 0.54 | 0.63 |
| G7Z7T4                | <i>Azospirillum lipoferum</i>       | OmaA                                      | -    | -    | -    | 0.10 | -    |
| G8M678 <sup>b</sup>   | <i>Burkholderia</i> spp.            | extracellular solute-binding protein      | -    | 0.43 | -    | -    | -    |
| G8M683 <sup>b</sup>   | <i>Burkholderia</i> spp.            | OmpC                                      | -    | 0.13 | -    | -    | -    |
| G8M6G8                | <i>Burkholderia</i> sp.             | OmpA/MotB family protein                  | -    | 0.6  | -    | -    | -    |
| G8M893                | <i>Burkholderia</i> sp.             | porin                                     | -    | -    | -    | 0.17 | 0.56 |
| G8MAY7                | <i>Burkholderia</i> sp.             | porin                                     | -    | -    | -    | 0.11 | 0.36 |
| G8MB24 <sup>b</sup>   | <i>Burkholderia</i> spp.            | branched chain amino acid ABC transporter | -    | 0.07 | -    | -    | -    |
| G8TGU8                | <i>Niastella koreensis</i>          | TonB-dependent receptor G                 | -    | -    | -    | -    | 0.02 |
| H0E3A2 <sup>a,b</sup> | <i>Patulibacter</i> spp.            | phosphate binding protein                 | -    | 1.49 | 1.08 | 0.08 | -    |
| H1KP99                | <i>Methylobacterium extorquens</i>  | porin                                     | -    | -    | 0.22 | -    | -    |
| H1S518                | <i>Cupriavidus basilensis</i>       | HlyD                                      | -    | 0.07 | -    | -    | -    |
| H1S150                | <i>Cupriavidus basilensis</i>       | porin                                     | -    | -    | -    | -    | 0.18 |
| H1Y2T7                | <i>Mucilaginibacter paludis</i>     | OmpA/MotB domain protein                  | -    | -    | -    | 0.06 | 0.10 |
| I0KRP1                | <i>Stenotrophomonas maltophilia</i> | TonB-dependent receptor                   | -    | -    | -    | -    | 0.06 |
| I2BKL0 <sup>b</sup>   | <i>Pseudomonas</i> spp.             | OprD                                      | 0.10 | -    | -    | -    | -    |
| I2BLJ9                | <i>Pseudomonas fluorescens</i>      | porin                                     | -    | 0.45 | -    | -    | -    |
| I2BPB1                | <i>Pseudomonas fluorescens</i>      | FpvA                                      | 0.09 | -    | -    | -    | -    |
| I2BVR7                | <i>Pseudomonas fluorescens</i>      | OprD                                      | 0.38 | -    | -    | -    | -    |
| I2BWR7                | <i>Pseudomonas fluorescens</i>      | TagQ                                      | 0.34 | -    | -    | -    | -    |
| I2BWZ9                | <i>Pseudomonas fluorescens</i>      | NLPA family lipoprotein                   | 0.39 | -    | -    | -    | -    |
| I2IFR8 <sup>b</sup>   | <i>Burkholderia</i> spp.            | porin                                     | -    | -    | -    | -    | 0.48 |
| I3AHW1                | <i>Serratia plymuthica</i>          | outer membrane protein A                  | 0.29 | -    | -    | -    | -    |
| I4K2Q7 <sup>b</sup>   | <i>Pseudomonas</i> spp.             | OprB                                      | 0.20 | -    | -    | -    | -    |

|                        |                                   |                                           |      |      |      |      |      |
|------------------------|-----------------------------------|-------------------------------------------|------|------|------|------|------|
| I4KG72 <sup>b</sup>    | <i>Pseudomonas</i> spp.           | amino acid ABC transporter                | 0.29 | -    | -    | -    | -    |
| I4KV15                 | <i>Pseudomonas synxantha</i>      | TonB-dependent receptor                   | 0.15 | -    | -    | -    | -    |
| I4MZT9                 | <i>Pseudomonas</i> sp.            | LivK                                      | 0.43 | -    | -    | -    | -    |
| I4VVL8 <sup>b</sup>    | <i>Rhodanobacter</i> spp.         | TonB-dependent receptor                   | -    | -    | -    | 0.03 | 0.06 |
| I4W1F0                 | <i>Rhodanobacter spathiphylli</i> | TonB-dependent receptor                   | -    | -    | -    | -    | 0.07 |
| I4W299 <sup>b</sup>    | <i>Rhodanobacter</i> spp.         | PilQ                                      | -    | -    | -    | -    | 0.12 |
| I5D4U3                 | <i>Burkholderia terrae</i>        | OmpA/MotB domain-containing protein       | -    | 0.43 | -    | -    | 0.52 |
| J2SD86                 | <i>Flavobacterium</i> sp.         | TonB-linked outer membrane protein,       | -    | -    | -    | -    | 0.02 |
| J2T7G6                 | <i>Variovorax</i> sp.             | porin                                     | -    | -    | 0.20 | 0.24 | 0.24 |
| J2TZX3 <sup>b</sup>    | <i>Pseudomonas</i> spp.           | OprD family porin                         | -    | -    | 0.06 | -    | -    |
| J2Z2M0 <sup>b</sup>    | <i>Pseudomonas</i> spp.           | peptidoglycan-associated lipoprotein      | 0.24 | 0.19 | 0.08 | -    | -    |
| J3CB80                 | <i>Variovorax</i> sp.             | porin                                     | -    | 0.10 | 0.05 | 0.20 | 0.25 |
| J3CWR3                 | <i>Bradyrhizobium</i> sp.         | porin                                     | -    | 0.05 | 0.16 | 0.29 | 0.44 |
| J3DTD1                 | <i>Pseudomonas putida</i>         | OprD family porin                         | -    | 0.15 | 0.10 | 0.04 | 0.06 |
| J3GVG6                 | <i>Pseudomonas</i> sp.            | OprD family porin                         | -    | 0.13 | 0.04 | -    | -    |
| K0HTW4                 | <i>Acidovorax</i> sp.             | OmpA/MotB                                 | -    | -    | -    | 0.32 | -    |
| K8P9Z0                 | <i>Afipia broomeae</i>            | porin                                     | -    | -    | -    | -    | 0.24 |
| K8R697                 | <i>Burkholderia</i> sp.           | porin                                     | -    | -    | -    | -    | 0.15 |
| K8R8N3                 | <i>Burkholderia</i> sp.           | OmpC family porin                         | -    | -    | -    | 0.05 | 0.32 |
| K8RAU9                 | <i>Burkholderia</i> sp.           | OmpC family porin                         | -    | 0.13 | 0.10 | 0.15 | 0.53 |
| K8RQJ6                 | <i>Burkholderia</i> sp.           | porin                                     | -    | -    | -    | -    | 0.46 |
| K9AC78                 | <i>Acinetobacter baumannii</i>    | Omp38                                     | 0.39 | 0.58 | 0.45 | 0.08 | -    |
| K9ACC8                 | <i>Acinetobacter baumannii</i>    | DcaP-like                                 | 0.15 | 0.38 | 0.21 | -    | -    |
| K9CQK5                 | <i>Acinetobacter baumannii</i>    | transporter, Omp1/FadL/TodX family        | -    | 0.09 | 0.06 | -    | -    |
| L2EK35 <sup>b</sup>    | <i>Cupriavidus</i> spp.           | porin                                     | -    | -    | -    | 0.43 | 0.96 |
| L7H9X2                 | <i>Pseudomonas fluorescens</i>    | branched-chain amino acid ABC transporter | 0.35 | -    | -    | -    | -    |
| L7HLG1                 | <i>Pseudomonas fluorescens</i>    | porin                                     | 0.76 | -    | -    | -    | -    |
| Q213J7                 | <i>Rhodopseudomonas palustris</i> | Omp2b                                     | -    | -    | 0.13 | -    | 0.36 |
| Q46WM6                 | <i>Ralstonia eutropha</i>         | porin                                     | -    | -    | -    | -    | 0.33 |
| Q4FCM8                 | <i>Acinetobacter</i> sp.          | outer membrane protein A                  | 0.16 | -    | -    | -    | -    |
| Q5QQ59                 | <i>Pseudomonas fluorescens</i>    | OprE3                                     | 0.49 | -    | -    | -    | -    |
| Q6FE98                 | <i>Acinetobacter</i> sp.          | porin                                     | 0.10 | -    | -    | -    | -    |
| Q985C3                 | <i>Rhizobium loti</i>             | porin                                     | -    | -    | 0.05 | 0.10 | 0.10 |
| UPI0002885851          | <i>Pseudomonas</i> sp.            | LivK                                      | 0.63 | -    | -    | -    | -    |
| UPI00028A1D9E          | <i>Sphingomonas</i> sp.           | TonB-dependent receptor                   | -    | -    | -    | -    | 0.03 |
| UPI00029AA93B          | <i>Pseudomonas geniculata</i>     | TonB-dependent receptor                   | -    | -    | -    | -    | 0.05 |
| <b>Other functions</b> |                                   |                                           |      |      |      |      |      |
| A0KAZ1 <sup>a,b</sup>  | <i>Burkholderia</i> spp.          | cell division factor                      | -    | 0.10 | -    | -    | -    |
| A4VLW4 <sup>a,b</sup>  | <i>Pseudomonas</i> spp.           | adenylosuccinate lyase                    | 0.06 | -    | -    | -    | -    |

|                         |                                     |                                           |      |      |      |      |      |
|-------------------------|-------------------------------------|-------------------------------------------|------|------|------|------|------|
| A6VCJ6 <sup>a</sup>     | <i>Pseudomonas aeruginosa</i>       | polyribonucleotide nucleotidyltransferase | 0.14 | -    | -    | -    | -    |
| B2KBE7                  | <i>Elusimicrobium minutum</i>       | Smc                                       | -    | -    | -    | 0.03 | -    |
| C3K1M9 <sup>b</sup>     | <i>Pseudomonas</i> spp.             | inositol monophosphatase                  | 0.13 | -    | -    | -    | -    |
| C3K1U2                  | <i>Pseudomonas fluorescens</i>      | aminotransferase                          | 0.10 | -    | -    | -    | -    |
| C3K5Y0 <sup>b</sup>     | <i>Pseudomonas</i> spp.             | NADP(H)-dependent aldo-keto reductase     | 0.08 | -    | -    | -    | -    |
| C3KD06                  | <i>Pseudomonas fluorescens</i>      | amidase                                   | 0.04 | -    | -    | -    | -    |
| C3KEC6 <sup>b</sup>     | <i>Pseudomonas</i> spp.             | adenylate kinase                          | 0.22 | -    | -    | -    | -    |
| E2XPE0 <sup>b</sup>     | <i>Pseudomonas</i> spp.             | peptidyl-prolyl cis-trans isomerase       | 0.58 | 0.38 | -    | -    | -    |
| E2XX99                  | <i>Pseudomonas fluorescens</i>      | iron-regulated protein                    | 0.21 | -    | -    | -    | -    |
| I2BTN8 <sup>b</sup>     | <i>Pseudomonas</i> spp.             | chromosome partitioning protein           | 0.20 | -    | -    | -    | -    |
| I2BZ33 <sup>b</sup>     | <i>Pseudomonas</i> spp.             | YeaG                                      | 0.24 | -    | -    | -    | -    |
| UPI00028A32F2           | <i>Pseudomonas extremaustralis</i>  | VacJ family lipoprotein                   | 0.31 | -    | -    | -    | -    |
| <b>Function unknown</b> |                                     |                                           |      |      |      |      |      |
| A6UXA9 <sup>a,b</sup>   | <i>Pseudomonas</i> spp.             |                                           | 0.08 | -    | -    | -    | -    |
| A2VTE3 <sup>a,b</sup>   | <i>Burkholderia</i> spp.            |                                           | -    | 0.14 | -    | -    | -    |
| B7L1B2 <sup>b</sup>     | <i>Methylobacterium</i> spp.        |                                           | -    | -    | 0.12 | 0.09 | -    |
| C3JYK6                  | <i>Pseudomonas fluorescens</i>      |                                           | -    | 0.87 | -    | -    | -    |
| C3K3H1                  | <i>Pseudomonas fluorescens</i>      |                                           | 0.29 | -    | -    | -    | -    |
| C3K3V2                  | <i>Pseudomonas fluorescens</i>      |                                           | 0.53 | -    | -    | -    | -    |
| C3KBL3 <sup>b</sup>     | <i>Pseudomonas</i> spp.             |                                           | 0.22 | -    | -    | -    | -    |
| C3KED5                  | <i>Pseudomonas fluorescens</i>      |                                           | 0.35 | -    | -    | -    | -    |
| C6WZ97                  | <i>Methylothera mobilis</i>         |                                           | 0.19 | 0.14 | 0.17 | 0.12 | 0.10 |
| D7DNB6                  | <i>Methylothera</i> sp.             |                                           | 0.16 | 0.07 | 0.07 | 0.07 | -    |
| D8JLH9 <sup>b</sup>     | <i>Acinetobacter</i> spp.           |                                           | -    | 0.13 | 0.09 | -    | -    |
| D8JYJ3                  | <i>Hyphomicrobium denitrificans</i> |                                           | -    | -    | -    | -    | 0.06 |
| E2XJW5                  | <i>Pseudomonas fluorescens</i>      |                                           | 0.10 | -    | -    | -    | -    |
| E2XLQ8                  | <i>Pseudomonas fluorescens</i>      |                                           | 0.38 | 0.29 | -    | -    | -    |
| E2XUK8                  | <i>Pseudomonas fluorescens</i>      |                                           | -    | 0.47 | -    | -    | -    |
| G4MGY8 <sup>b</sup>     | <i>Burkholderia</i> spp.            |                                           | -    | 0.59 | -    | -    | -    |
| I2BNE9 <sup>b</sup>     | <i>Pseudomonas</i> spp.             |                                           | 0.11 | -    | -    | -    | -    |
| I2BVK9                  | <i>Pseudomonas fluorescens</i>      |                                           | -    | 0.60 | -    | -    | -    |
| I2BWV2 <sup>b</sup>     | <i>Pseudomonas</i> spp.             |                                           | 0.44 | 0.13 | -    | -    | -    |
| J8V5Q9                  | <i>Pseudomonas putida</i>           |                                           | -    | 0.11 | 0.33 | -    | -    |
| UPI000288EA66           | <i>Pseudomonas extremaustralis</i>  |                                           | 0.13 | -    | -    | -    | -    |
| UPI000289F004           | <i>Pseudomonas extremaustralis</i>  |                                           | 0.10 | -    | -    | -    | -    |

<sup>a</sup> This protein could be assigned to more than one bacterial genus. The genus mentioned was arbitrarily chosen as it represented the most abundant genus at the sampling date.

<sup>b</sup> This protein could be assigned to more than one species of the genus mentioned.

<sup>c</sup> Protein not detected or protein identification not considered valid.

**Table S2** Proteins produced by *Rhodanobacter thiooxidans* LCS2 during growth in minimal medium supplemented with suberin at day 5 and day 30

| Uniprot accession number     | Putative function                          | Abundance (NSpC <sup>a</sup> ) |         |
|------------------------------|--------------------------------------------|--------------------------------|---------|
|                              |                                            | 5 days                         | 30 days |
| <b>Amino acid metabolism</b> |                                            |                                |         |
| <b>I4VHY4<sup>b</sup></b>    | methylisocitrate lyase                     | 0.16                           | 0.23    |
| <b>I4VI38</b>                | cysteine synthase                          | - <sup>c</sup>                 | 1.23    |
| <b>I4VNT3</b>                | isovaleryl-CoA dehydrogenase               | 0.07                           | -       |
| <b>I4VP75</b>                | glutamine synthetase                       | -                              | 0.07    |
| I4VUT5                       | pyrroline-5-carboxylate reductase          | -                              | 0.07    |
| <b>I4VWA7</b>                | Xaa-Pro aminopeptidase                     | 0.04                           | -       |
| <b>I4W1V5</b>                | anthranilate phosphoribosyltransferase     | -                              | 0.04    |
| <b>I4W2U0</b>                | asparaginase                               | -                              | 0.14    |
| I4W3N8                       | HtpX, protease                             | -                              | 0.05    |
| <b>I4W5U6</b>                | N-acetylornithine carbamoyltransferase     | 0.26                           | -       |
| <b>I4W668</b>                | aspartate-semialdehyde dehydrogenase       | 0.08                           | -       |
| <b>I4W6F3</b>                | histidine ammonia-lyase                    | -                              | 0.04    |
| I4W6N2                       | peptidyl-prolyl cis-trans isomerase        | -                              | 0.09    |
| <b>I4W9W4</b>                | cysteine synthase                          | 3.41                           | 7.35    |
| I4WAC2                       | peptidyl-prolyl cis-trans isomerase        | 0.20                           | 0.08    |
| I4WAU6                       | 3-dehydroquininate dehydratase             | -                              | 0.34    |
| <b>I4WAZ4</b>                | methylcrotonoyl-CoA carboxylase            | 0.03                           | -       |
| <b>I4WB23</b>                | 4-hydroxy-tetrahydrodipicolinate synthase  | 0.08                           | 0.13    |
| <b>I4WB48</b>                | methionine aminotransferase                | 0.04                           | 0.40    |
| I4WBE2                       | peptidase M28                              | 0.04                           | -       |
| I4WBP2                       | glycyl aminopeptidase                      | 0.07                           | 0.06    |
| <b>I4WBY8</b>                | arginine decarboxylase                     | 0.03                           | 0.04    |
| <b>I4WBY9</b>                | polyamine aminopropyl transferase          | 0.24                           | 0.48    |
| I4WC22                       | glutamine synthetase                       | 0.13                           | -       |
| <b>I4WC30</b>                | Zn-dependent oligopeptidase                | 0.11                           | 0.14    |
| <b>I4WC93</b>                | shikimate dehydrogenase                    | -                              | 0.33    |
| <b>I4WCE3</b>                | branched-chain amino acid aminotransferase | -                              | 0.09    |
| I4WCR0                       | aminopeptidase N                           | 0.10                           | -       |
| <b>I4WCU6</b>                | aromatic amino acid aminotransferase       | 0.34                           | 0.58    |
| I4WD72                       | peptidase M28                              | 0.12                           | 0.08    |
| I4WD80                       | protease                                   | 0.17                           | 0.63    |
| I4WDN0                       | alanine dehydrogenase                      | -                              | 0.07    |
| <b>I4WDQ1</b>                | leucine dehydrogenase                      | 0.36                           | 0.24    |
| <b>I4WDT5</b>                | ArgD, acetylornithine aminotransferase     | 0.22                           | 0.40    |
| I4WE81                       | arginase                                   | 0.03                           | -       |
| <b>I4WEE3</b>                | cysteine desulfurase                       | 0.04                           | 0.10    |



|               |                                                                          |      |      |
|---------------|--------------------------------------------------------------------------|------|------|
| <b>I4WEG3</b> | ornithine/acetylornithine aminotransferase                               | 0.10 | 0.45 |
| <b>I4WEG6</b> | proline iminopeptidase                                                   | -    | 0.13 |
| <b>I4WEG8</b> | D-3-phosphoglycerate dehydrogenase                                       | 0.43 | 0.16 |
| I4WEP6        | dipeptidyl aminopeptidase/acylaminoacyl peptidase                        | -    | 0.03 |
| I4WEZ1        | nitrogen regulatory protein P-II                                         | 0.50 | 0.38 |
| I4WFS5        | protease                                                                 | 0.11 | -    |
| <b>I4WFS8</b> | leucine aminopeptidase                                                   | 0.04 | 0.03 |
| I4WG51        | cystathionine beta-lyase/cystathionine gamma-synthase                    | 0.10 | 0.10 |
| I4WG78        | GcvT, aminomethyltransferase                                             | 0.40 | 0.14 |
| <b>I4WG79</b> | glycine cleavage system H protein                                        | 0.86 | 0.46 |
| <b>I4WGE0</b> | maleylacetoacetate isomerase                                             | -    | 0.08 |
| <b>I4WGE5</b> | cysteine synthase                                                        | 0.17 | 0.46 |
| I4WGQ3        | peptidase M28                                                            | -    | 0.09 |
| I4WH07        | peptidase S10 serine carboxypeptidase                                    | -    | 0.02 |
| I4WH24        | peptidyl-dipeptidase                                                     | 0.03 | 0.21 |
| <b>I4WHD2</b> | bifunctional proline dehydrogenase/pyrroline-5-carboxylate dehydrogenase | 0.14 | 0.11 |
| I4WHD9        | peptidyl-dipeptidase                                                     | 0.07 | 0.52 |
| <b>I4WI88</b> | 4-hydroxy-tetrahydrodipicolinate reductase                               | 0.08 | 0.04 |
| <b>I4WI91</b> | carbamoyl-phosphate synthase                                             | 0.08 | -    |
| <b>I4WI92</b> | carbamoyl phosphate synthase                                             | 0.08 | -    |
| I4WIP0        | 3-phosphoshikimate 1-carboxyvinyltransferase                             | 0.11 | 0.04 |
| <b>I4WIP2</b> | phosphoserine aminotransferase                                           | 0.10 | 0.12 |
| <b>I4WIR5</b> | glycine dehydrogenase                                                    | 0.08 | 0.15 |
| I4WIT5        | D-amino acid dehydrogenase                                               | 0.07 | 0.14 |
| I4WIU0        | HflC                                                                     | -    | 0.23 |
| <b>I4WIU1</b> | protease                                                                 | 0.17 | 0.21 |
| I4WIU5        | peptidase                                                                | 0.15 | 0.15 |
| I4WIU6        | peptidase S46                                                            | -    | 0.03 |
| <b>I4WIU8</b> | L-threonine 3-dehydrogenase                                              | 0.09 | -    |
| <b>I4WIV0</b> | 2-amino-3-ketobutyrate coenzyme A ligase                                 | 0.13 | 0.23 |
| <b>I4WIW2</b> | aspartate aminotransferase                                               | 0.24 | 1.49 |
| <b>I4WIW4</b> | peptidyl-prolyl cis-trans isomerase                                      | -    | 0.17 |
| <b>I4WJA2</b> | serine hydroxymethyltransferase                                          | 0.12 | 0.38 |
| I4WJL2        | protease                                                                 | 0.06 | 0.07 |
| I4WJL5        | X-Pro dipeptidyl-peptidase                                               | -    | 0.03 |
| I4WJU9        | ProC, pyrroline-5-carboxylate reductase                                  | 0.18 | -    |
| I4WKD9        | methylthioribose-1-phosphate isomerase                                   | -    | 0.03 |
| <b>I4WKJ1</b> | histidine ammonia-lyase                                                  | 0.04 | -    |
| <b>I4WL26</b> | protease                                                                 | 0.20 | 0.16 |
| <b>I4WLF3</b> | tryptophan synthase beta chain                                           | 0.01 | -    |
| <b>I4WLH1</b> | imidazoleglycerol-phosphate dehydratase                                  | -    | 0.03 |
| <b>I4WLV4</b> | aminotransferase                                                         | 0.11 | 0.34 |

|               |                                                                    |      |      |
|---------------|--------------------------------------------------------------------|------|------|
| <b>I4WM29</b> | acetylornithine deacetylase                                        | 0.06 | 0.04 |
| I4WM35        | metalloendopeptidase                                               | 0.47 | 0.76 |
| I4WM64        | prepilin-type N-terminal cleavage                                  | 0.14 | -    |
| <b>I4WM81</b> | NAD-glutamate dehydrogenase                                        | 0.08 | 0.10 |
| <b>I4WM86</b> | glutaryl-CoA dehydrogenase                                         | 0.27 | 0.36 |
| I4WMC6        | peptidyl-prolyl cis-trans isomerase                                | 0.06 | -    |
| <b>I4WMK5</b> | kynureninase                                                       | -    | 0.15 |
| <b>I4WMM4</b> | carbamoyl phosphate synthase                                       | 0.03 | -    |
| <b>I4WN39</b> | Xaa-Pro dipeptidase                                                | 0.05 | 0.22 |
| I4WN55        | peptidase S8/S53                                                   | 0.02 | 0.17 |
| <b>I4WN66</b> | Indole-3-glycerol phosphate synthase                               | 0.21 | 0.29 |
| I4WN78        | dipeptidase                                                        | 0.03 | -    |
| I4WPB8        | HutI, imidazolonepropionase                                        | 0.06 | 0.03 |
| <b>I4WPC0</b> | N-formimino-L-glutamate deiminase                                  | -    | 0.03 |
| <b>I4WPD1</b> | urocanate hydratase                                                | 0.06 | 0.31 |
| I4WPH1        | Xaa-Pro aminopeptidase                                             | -    | 0.02 |
| I4WPJ5        | peptidyl-prolyl cis-trans isomerase                                | 0.18 | 0.20 |
| I4WPK6        | peptidyl-prolyl cis-trans isomerase                                | 0.85 | 0.44 |
| I4WQ39        | argininosuccinate synthase                                         | 0.17 | 0.10 |
| <b>I4WQ41</b> | acetylornithine deacetylase                                        | 0.03 | -    |
| <b>I4WQ42</b> | acetylglutamate kinase                                             | -    | 0.04 |
| <b>I4WQ44</b> | argininosuccinate lyase                                            | 0.11 | -    |
| I4WQ91        | metallopeptidase                                                   | 0.02 | 0.23 |
| <b>I4WQ99</b> | peptidyl-prolyl cis-trans isomerase                                | 0.26 | -    |
| I4WQQ8        | gamma-glutamyltranspeptidase                                       | -    | 0.07 |
| I4WRE3        | TrpA, tryptophan synthase                                          | 0.17 | -    |
| <b>I4WRG1</b> | histidinol dehydrogenase                                           | 0.05 | -    |
| <b>I4WRG9</b> | enolase-phosphatase                                                | 0.10 | 0.98 |
| I4WRS1        | aminopeptidase                                                     | 0.14 | 0.03 |
| I4WRX3        | gamma-glutamyltranspeptidase                                       | 0.08 | -    |
| <b>I4WSM1</b> | aminopeptidase                                                     | -    | 0.11 |
| <b>I4WSM4</b> | threonine aldolase                                                 | -    | 0.25 |
| <b>I4WSY4</b> | branched-chain amino acid aminotransferase                         | 0.23 | 0.91 |
| <b>I4WSY6</b> | methylenetetrahydrofolate reductase                                | -    | 0.08 |
| I4WT46        | peptidase M28                                                      | 0.28 | 0.22 |
| I4WTB2        | metallopeptidase                                                   | 0.05 | 0.07 |
| <b>I4WU28</b> | 2,3,4,5-tetrahydropyridine-2,6-dicarboxylate N-succinyltransferase | 0.31 | 0.45 |
| <b>I4WVA0</b> | peptidyl-prolyl cis-trans isomerase                                | 0.36 | -    |
| I4WZ73        | X-Pro dipeptidyl-peptidase                                         | 0.04 | -    |
| M4NC29        | Zn-dependent peptidase                                             | -    | 0.02 |
| <b>M4NEI4</b> | ornithine carbamoyltransferase                                     | -    | 0.14 |

#### **Carbohydrate metabolism**

|                                                    |                                                                     |      |      |
|----------------------------------------------------|---------------------------------------------------------------------|------|------|
| <b>I4VKM3</b>                                      | inositol monophosphatase/fructose-1,6-bisphosphatase family protein | -    | 0.05 |
| <b>I4WAH6</b>                                      | phosphoglucomutase                                                  | 0.08 | 0.10 |
| <b>I4WAH7</b>                                      | glucose-6-phosphate isomerase                                       | 0.04 | 0.16 |
| <b>I4WAH8</b>                                      | transaldolase                                                       | 0.12 | 0.63 |
| <b>I4WBW6</b>                                      | ribokinase                                                          | -    | 0.18 |
| <b>I4WBX9</b>                                      | phosphomannomutase                                                  | 0.02 | 0.09 |
| <b>I4WCH0</b>                                      | GDP-L-fucose synthase                                               | 0.07 | -    |
| I4WCI9                                             | Fpb, fructose-1,6-bisphosphatase                                    | 0.09 | 0.11 |
| I4WCL1                                             | L-sorbose dehydrogenase                                             | 0.08 | 0.13 |
| <b>I4WCP3</b>                                      | Glk PE, glucokinase                                                 | 0.03 | -    |
| <b>I4WDU0</b>                                      | 6-phosphofructokinase                                               | -    | 0.03 |
| <b>I4WEL7</b>                                      | 2-dehydro-3-deoxy-6-phosphogalactonate aldolase                     | -    | 0.11 |
| I4WEN5                                             | 6-phosphogluconate dehydrogenase-like protein                       | -    | 0.20 |
| <b>I4WEQ2</b>                                      | Entner-Doudoroff aldolase                                           | 0.45 | 0.75 |
| <b>I4WEQ3</b>                                      | phosphogluconate dehydratase                                        | 0.10 | 0.24 |
| <b>I4WEQ4</b>                                      | 6-phosphogluconolactonase                                           | 0.44 | 0.42 |
| <b>I4WEQ5</b>                                      | glucose-6-phosphate 1-dehydrogenase                                 | 0.30 | 0.92 |
| <b>I4WF95</b>                                      | 2,3-bisphosphoglycerate-dependent phosphoglycerate mutase           | 0.25 | 0.09 |
| <b>I4WGD0</b>                                      | glyceraldehyde-3-phosphate dehydrogenase                            | 0.42 | -    |
| <b>I4WGD2</b>                                      | Pyruvate kinase                                                     | 0.48 | 0.62 |
| <b>I4WGD4</b>                                      | fructose-bisphosphate aldolase                                      | 0.33 | 0.49 |
| I4WGD7                                             | transketolase                                                       | 0.11 | 0.75 |
| <b>I4WGD9</b>                                      | Pgk, phosphoglycerate kinase                                        | 0.13 | 0.21 |
| I4WGM3                                             | xylanase deacetylase                                                | 0.42 | 0.82 |
| I4WH34                                             | alpha,alpha-trehalase                                               | 0.05 | -    |
| <b>I4WHZ0</b>                                      | phosphoketolase                                                     | -    | 0.06 |
| I4WI35                                             | propanediol utilization protein                                     | 0.29 | -    |
| I4WIU7                                             | glycogen debranching enzyme                                         | 0.20 | 0.11 |
| <b>I4WM90</b>                                      | transketolase domain-containing protein                             | 0.02 | -    |
| I4WN50                                             | ribose-5-phosphate isomerase                                        | 0.35 | 0.52 |
| I4WN86                                             | glycoside hydrolase clan GH-D                                       | -    | 0.01 |
| <b>I4WN98</b>                                      | ribulose-phosphate 3-epimerase                                      | 0.13 | 0.15 |
| I4WPH4                                             | enolase                                                             | 0.33 | 1.17 |
| I4WPK2                                             | phosphoenolpyruvate synthase                                        | 0.13 | 0.08 |
| <b>I4WQC6</b>                                      | N-ethylammelane chlorohydrolase                                     | 0.09 | 0.25 |
| <b>I4WRP0</b>                                      | fructose-1,6-bisphosphatase                                         | 0.09 | -    |
| I4WRR0                                             | cyclomaltodextrin glucanotransferase                                | 0.20 | 0.38 |
| <b>I4WRR9</b>                                      | alpha-glucosidase                                                   | 0.08 | 0.08 |
| I4WU59                                             | PEP phosphonmutase-like protein                                     | -    | 0.07 |
| <b>M4NMT8</b>                                      | transaldolase                                                       | 0.06 | 0.15 |
| <b>Cell wall, membrane and envelope biogenesis</b> |                                                                     |      |      |
| <b>I4VNC9</b>                                      | glycosyl transferase family protein                                 | -    | 0.09 |

|               |                                                                                     |      |      |
|---------------|-------------------------------------------------------------------------------------|------|------|
| <b>I4VVG1</b> | D-alanine--D-alanine ligase                                                         | 0.08 | -    |
| I4VX44        | LysM domain-containing protein                                                      | 0.18 | -    |
| I4VZT9        | C-terminal processing peptidase                                                     | 0.05 | -    |
| <b>I4W030</b> | lipoprotein releasing system transmembrane protein LolC/E family                    | -    | 0.03 |
| I4W2A0        | pilus assembly protein                                                              | 0.30 | 0.35 |
| I4W2P0        | membrane fusion protein                                                             | 0.09 | -    |
| I4W6X0        | UTP-glucose-1-phosphate uridylyltransferase                                         | 0.14 | -    |
| <b>I4WAP1</b> | BamD, outer membrane protein assembly factor                                        | 0.29 | 0.14 |
| I4WAZ3        | outer membrane protein                                                              | 1.31 | 0.31 |
| I4WB89        | type 4 fimbrial biogenesis protein pily1-related protein                            | 0.03 | 0.13 |
| <b>I4WC49</b> | glycosyl transferase family protein                                                 | 0.22 | -    |
| <b>I4WCG1</b> | glycosyl transferase family protein                                                 | 0.06 | 0.05 |
| <b>I4WCH4</b> | Class II pilin PilE                                                                 | 3.60 | 3.90 |
| I4WDT8        | UDP-N-acetylmuramate--L-alanine ligase                                              | 0.06 | -    |
| I4WDV8        | glycosyltransferase                                                                 | -    | 0.04 |
| I4WEJ0        | BamA .outer membrane protein assembly factor                                        | 0.09 | 0.23 |
| <b>I4WEJ4</b> | lipid-A-disaccharide synthase                                                       | 0.03 | -    |
| <b>I4WEQ7</b> | glucosamine-fructose-6-phosphate aminotransferase                                   | 0.11 | -    |
| I4WER7        | lipid A 3-O-deacylase                                                               | 0.19 | -    |
| I4WF26        | Rhs family protein                                                                  | -    | 0.01 |
| I4WFA3        | membrane fusion protein                                                             | -    | 0.08 |
| I4WFN8        | GlmU, bifunctional acetyl transferase/uridyl transferase                            | 0.14 | -    |
| I4WFT7        | D-alanyl-D-alanine carboxypeptidase                                                 | 0.04 | 0.08 |
| <b>I4WG42</b> | glucosamine--fructose-6-phosphate aminotransferase                                  | -    | 0.13 |
| I4WG67        | aminotransferase                                                                    | 0.18 | 0.24 |
| I4WGE3        | OmpA/MotB domain-containing protein                                                 | -    | 0.07 |
| <b>I4WGE6</b> | glucosamine--fructose-6-phosphate aminotransferase                                  | 0.15 | -    |
| I4WGM9        | LysM domain-containing protein                                                      | 0.79 | 0.51 |
| <b>I4WGP0</b> | glycosyl/glycerophosphate transferase                                               | -    | 0.09 |
| I4WGU3        | peptidoglycan-associated lipoprotein                                                | 3.39 | 6.24 |
| I4WGU4        | Tol-pal system protein                                                              | 0.20 | -    |
| I4WH26        | hemagglutinin                                                                       | 0.08 | 0.13 |
| I4WI78        | BamE, outer membrane protein assembly factor                                        | -    | 0.15 |
| I4WIC8        | type IV pilus biogenesis/stability protein                                          | 0.05 | 0.12 |
| I4WID1        | BamB, outer membrane protein assembly factor                                        | 0.31 | 0.29 |
| <b>I4WIN9</b> | 3-deoxy-manno-octulosonate cytidylyltransferase                                     | 0.07 | -    |
| I4WIT4        | alanine racemase                                                                    | 0.05 | 0.09 |
| I4WIV2        | peptidoglycan-associated protein                                                    | 2.18 | 2.38 |
| <b>I4WJ11</b> | capsular polysaccharide biosynthesis protein                                        | 0.04 | 0.04 |
| I4WJS2        | filamentous hemagglutin-like                                                        | 0.77 | 0.29 |
| <b>I4WJT4</b> | two-component system sensor histidine kinase-response regulator hybrid protein pill | 0.05 | 0.05 |

|                                         |                                                                                                                        |      |      |
|-----------------------------------------|------------------------------------------------------------------------------------------------------------------------|------|------|
| I4WJT5                                  | pilus biogenesis protein                                                                                               | 0.22 | 0.17 |
| <b>I4WM62</b>                           | Tfp pilus assembly protein FimT-like protein                                                                           | -    | 0.08 |
| I4WM66                                  | PilY1, type 4 fimbrial biogenesis protein                                                                              | 0.03 | 0.03 |
| <b>I4WM67</b>                           | PilE                                                                                                                   | -    | 0.09 |
| I4WMA3                                  | OmpA-like                                                                                                              | -    | 0.54 |
| <b>I4WNG6</b>                           | fimbrial assembly membrane protein                                                                                     | 0.65 | 0.54 |
| <b>I4WNG7</b>                           | fimbrial assembly membrane protein                                                                                     | 0.29 | 0.40 |
| <b>I4WNG8</b>                           | fimbrial assembly membrane protein                                                                                     | 0.34 | 0.22 |
| <b>I4WNG9</b>                           | penicillin-binding protein                                                                                             | -    | 0.02 |
| I4WNH8                                  | surface lipoprotein                                                                                                    | 0.03 | 0.13 |
| I4WPA0                                  | outer membrane lipoprotein                                                                                             | 1.55 | 0.93 |
| I4WPA1                                  | outer membrane protein                                                                                                 | 1.06 | 0.24 |
| <b>I4WPB6</b>                           | MsbA, lipid A export ATP-binding/permease protein                                                                      | 0.02 | 0.03 |
| <b>I4WPH3</b>                           | 2-dehydro-3-deoxyphosphooctonate aldolase                                                                              | 0.25 | 0.28 |
| <b>I4WPK7</b>                           | UDP-glucose dehydrogenase                                                                                              | 0.03 | 0.15 |
| I4WQ35                                  | outer membrane lipoprotein                                                                                             | 1.21 | 0.61 |
| I4WRC8                                  | lytic murein transglycosylase                                                                                          | -    | 0.02 |
| I4WRD8                                  | FimV N-terminal domain-containing protein                                                                              | 0.43 | 0.13 |
| <b>I4WRZ3</b>                           | flagellin domain-containing protein                                                                                    | -    | 0.29 |
| I4WSL0                                  | LPS-assembly protein LptD                                                                                              | 0.08 | 0.05 |
| <b>I4WT16</b>                           | UDP-N-acetylglucosamine--N-acetylmuramyl-(pentapeptide)<br>pyrophosphoryl-undecaprenol N-acetylglucosamine transferase | 0.12 | 0.05 |
| I4WTB1                                  | C-terminal processing peptidase                                                                                        | -    | 0.01 |
| I4WUZ6                                  | lytic murein transglycosylase                                                                                          | 0.03 | -    |
| <b>Energy production and conversion</b> |                                                                                                                        |      |      |
| <b>I4VKE0</b>                           | isocitrate dehydrogenase                                                                                               | 0.10 | -    |
| <b>I4VM16</b>                           | alcohol dehydrogenase                                                                                                  | -    | 0.09 |
| <b>I4VXG5</b>                           | succinyl-CoA ligase [ADP-forming] subunit alpha                                                                        | 0.28 | -    |
| <b>I4W1D3</b>                           | glyceraldehyde-3-phosphate dehydrogenase                                                                               | -    | 0.19 |
| <b>I4W1F4</b>                           | NADH:flavin oxidoreductase/NADH oxidase                                                                                | -    | 0.02 |
| <b>I4W1R0</b>                           | bifunctional malic enzyme oxidoreductase/phosphotransacetylase                                                         | -    | 0.02 |
| I4W332                                  | cytochrome c4                                                                                                          | 0.29 | 0.29 |
| I4W6A9                                  | high potential iron-sulfur protein                                                                                     | -    | 0.09 |
| <b>I4W788</b>                           | isocitrate lyase                                                                                                       | -    | 0.35 |
| <b>I4W7P8</b>                           | rubrerythrin                                                                                                           | -    | 0.33 |
| <b>I4W977</b>                           | NADPH:quinone oxidoreductase                                                                                           | 0.27 | 0.19 |
| <b>I4W9P0</b>                           | fumarate hydratase class II                                                                                            | 0.12 | 0.03 |
| I4WAP4                                  | succinyl-CoA ligase [ADP-forming] subunit beta                                                                         | 0.07 | 0.17 |
| I4WB45                                  | short-chain dehydrogenase                                                                                              | 0.04 | -    |
| <b>I4WB57</b>                           | aconitate hydratase                                                                                                    | 0.22 | 0.61 |
| I4WBN1                                  | ubiquinol-cytochrome c reductase iron-sulfur subunit                                                                   | 0.52 | 0.34 |
| <b>I4WBN2</b>                           | cytochrome b                                                                                                           | -    | 0.04 |
| I4WBN3                                  | ubiquinol-cytochrome c reductase                                                                                       | 0.39 | 0.26 |

|               |                                                                                     |      |      |
|---------------|-------------------------------------------------------------------------------------|------|------|
| I4WBP6        | sulfur oxidation protein, flavocytochrome C                                         | 0.03 | 0.06 |
| I4WBR2        | DsrE/DsrF-like family protein                                                       | 0.40 | 0.24 |
| <b>I4WD44</b> | aldehyde dehydrogenase                                                              | -    | 0.12 |
| <b>I4WD61</b> | oxydoreductase                                                                      | 0.08 | -    |
| <b>I4WDW2</b> | NADH dehydrogenase/NAD(P)H nitroreductase                                           | 0.21 | 0.12 |
| <b>I4WDY5</b> | dihydrolipoamide dehydrogenase                                                      | 0.38 | 0.13 |
| <b>I4WDY6</b> | dihydrolipoamide acetyltransferase                                                  | 0.78 | 0.24 |
| <b>I4WE11</b> | pyruvate dehydrogenase E1 component                                                 | 0.39 | 0.30 |
| <b>I4WE12</b> | bifunctional malic enzyme oxidoreductase/phosphotransacetylase                      | 0.15 | -    |
| <b>I4WE63</b> | aconitate hydratase                                                                 | -    | 0.04 |
| <b>I4WE70</b> | pyruvate dehydrogenase E1 alpha subunit                                             | 0.09 | 1.25 |
| <b>I4WE71</b> | pyruvate/2-oxoglutarate dehydrogenase complex, dehydrogenase component beta subunit | 0.46 | 1.82 |
| I4WEG7        | FAD/FMN-dependent dehydrogenase                                                     | 0.19 | 0.68 |
| I4WEU1        | sulfide-quinone reductase                                                           | 0.45 | 0.41 |
| <b>I4WFA2</b> | cytochrome c                                                                        | 0.53 | 0.22 |
| <b>I4WFB8</b> | isocitrate dehydrogenase                                                            | 0.34 | 1.24 |
| I4WFD5        | NADPH:quinone reductase                                                             | 0.18 | -    |
| <b>I4WFN1</b> | ATP synthase subunit b                                                              | 0.62 | 0.35 |
| I4WFN2        | AtpH, ATP synthase subunit delta                                                    | 0.18 | -    |
| <b>I4WFN3</b> | ATP synthase subunit alpha                                                          | 0.54 | 0.66 |
| I4WFN4        | ATP synthase gamma chain                                                            | 0.15 | 0.13 |
| <b>I4WFN5</b> | ATP synthase subunit beta                                                           | 0.56 | 0.55 |
| I4WG68        | electron transfer flavoprotein alpha subunit                                        | 0.36 | 0.69 |
| <b>I4WG69</b> | electron transfer flavoprotein subunit beta                                         | 0.65 | 0.44 |
| I4WG74        | electron transfer flavoprotein-ubiquinone oxidoreductase                            | 0.05 | 0.03 |
| <b>I4WG85</b> | glucose-methanol-choline oxidoreductase                                             | 0.09 | -    |
| I4WGC7        | azurin                                                                              | 0.75 | 0.34 |
| <b>I4WH70</b> | NAD(P) transhydrogenase                                                             | 0.26 | 0.30 |
| <b>I4WH92</b> | FAD-dependent pyridine nucleotide-disulfide oxidoreductase                          | 0.34 | 0.83 |
| I4WHD0        | cytochrome c oxidase subunit 2                                                      | 0.05 | 0.05 |
| <b>I4WHD3</b> | aldehyde dehydrogenase                                                              | 0.15 | 0.07 |
| I4WI10        | short chain dehydrogenase/reductase f                                               | 0.09 | 0.07 |
| <b>I4WIV5</b> | citrate synthase                                                                    | 0.29 | -    |
| <b>I4WIW1</b> | malate dehydrogenase                                                                | 0.30 | 0.56 |
| I4WJ90        | voltage-gated potassium channel beta subunit                                        | -    | 0.11 |
| <b>I4WJ91</b> | alcohol dehydrogenase superfamily protein                                           | 0.16 | 0.26 |
| <b>I4WJC7</b> | rubrerythrin                                                                        | 0.83 | -    |
| <b>I4WKC6</b> | 2-oxoglutarate dehydrogenase                                                        | 0.15 | 0.22 |
| <b>I4WKC7</b> | 2-oxoglutarate dehydrogenase                                                        | 0.43 | 0.34 |
| <b>I4WKC8</b> | dihydrolipoyl dehydrogenase                                                         | 0.54 | 0.33 |
| <b>I4WKE9</b> | NADH-quinone oxidoreductase subunit N                                               | -    | 0.05 |
| <b>I4WKF6</b> | NADH dehydrogenase subunit G                                                        | 0.08 | 0.04 |

|                                         |                                                         |      |      |
|-----------------------------------------|---------------------------------------------------------|------|------|
| <b>I4WKF7</b>                           | NADH-quinone oxidoreductase                             | 0.07 | -    |
| <b>I4WKG0</b>                           | NADH-quinone oxidoreductase                             | 0.13 | -    |
| <b>I4WLR8</b>                           | NADH-quinone oxidoreductase subunit C                   | -    | 0.15 |
| I4WMA7                                  | cytochrome c family protein                             | 0.05 | 0.08 |
| <b>I4WML0</b>                           | short-chain dehydrogenase                               | 0.19 | 0.19 |
| <b>I4WNH1</b>                           | citrate synthase                                        | 0.48 | 0.45 |
| <b>I4WP39</b>                           | cytochrome c biogenesis protein                         | 0.05 | -    |
| I4WPA7                                  | succinate dehydrogenase                                 | 0.09 | 0.05 |
| <b>I4WPA8</b>                           | succinate dehydrogenase                                 | 0.14 | 0.17 |
| I4WQ25                                  | FAD linked oxidase domain-containing protein            | -    | 0.07 |
| I4WRH2                                  | high potential iron-sulfur protein                      | 0.33 | -    |
| <b>I4WSC0</b>                           | NADP oxidoreductase                                     | 0.14 | 0.21 |
| <b>I4WSY9</b>                           | phosphoenolpyruvate carboxylase                         | 0.18 | 0.12 |
| I4WU19                                  | short-chain dehydrogenase                               | 0.12 | 0.37 |
| I4WU37                                  | nitrous-oxide reductase                                 | -    | 0.08 |
| <b>I4WUC8</b>                           | NADPH dehydrogenase                                     | 0.11 | 0.24 |
| <b>I4WW98</b>                           | pyruvate dehydrogenase                                  | 0.29 | -    |
| <b>M4NS93</b>                           | citrate synthase                                        | -    | 0.47 |
| <b>M4NTL5</b>                           | ATP synthase subunit delta                              | -    | 0.03 |
| <b>Lipid metabolism and ketogenesis</b> |                                                         |      |      |
| <b>I4VIC2</b>                           | acyl carrier protein                                    | -    | 1.44 |
| <b>I4VRU7</b>                           | 3-hydroxyacyl-CoA dehydrogenase                         | -    | 0.28 |
| <b>I4VV45</b>                           | YdiF, acetate-CoA transferase                           | -    | 0.13 |
| <b>I4VY74</b>                           | 3-oxoacyl-ACP reductase                                 | -    | 0.07 |
| I4VZY3                                  | acetoacetyl-CoA reductase                               | -    | 0.06 |
| <b>I4W091</b>                           | acyl-CoA dehydrogenase domain-containing protein        | 0.04 | -    |
| I4WAL3                                  | 3-hydroxydecanoyl-[acyl-carrier-protein] dehydratase    | -    | 0.08 |
| I4WAL4                                  | beta-ketoacyl-[ACP] synthase I                          | 0.12 | 0.43 |
| I4WAZ2                                  | acetoacetyl-CoA thiolase                                | 0.66 | 0.66 |
| <b>I4WB09</b>                           | 3-hydroxybutyryl-CoA dehydratase                        | 0.13 | -    |
| <b>I4WB55</b>                           | long-chain fatty acyl-CoA ligase                        | -    | 0.07 |
| <b>I4WBU8</b>                           | acetyl-coenzyme A synthetase                            | 0.11 | 0.12 |
| I4WBY7                                  | 3-hydroxybutyrate dehydrogenase                         | -    | 0.09 |
| I4WBZ6                                  | acetyl-CoA acetyltransferase                            | 0.13 | 0.07 |
| I4WCN8                                  | GpsA, glycerol-3-phosphate dehydrogenase                | 0.13 | 0.07 |
| <b>I4WDA0</b>                           | acyl-CoA dehydrogenase                                  | 0.04 | 0.25 |
| <b>I4WE25</b>                           | fatty acid binding protein                              | 0.15 | 0.09 |
| <b>I4WE72</b>                           | branched-chain alpha-keto acid dehydrogenase subunit E2 | 0.38 | 0.22 |
| <b>I4WEJ2</b>                           | FabZ, 3-hydroxyacyl-[acyl-carrier-protein] dehydratase  | -    | 0.29 |
| <b>I4WEK0</b>                           | acetyl-coenzyme A carboxylase carboxyl transferase      | -    | 0.04 |
| I4WFP4                                  | fatty acyl-CoA synthetase                               | 0.16 | 0.05 |
| I4WGM2                                  | lipase                                                  | 0.14 | 0.09 |

|                                                               |                                                                |      |      |
|---------------------------------------------------------------|----------------------------------------------------------------|------|------|
| <b>I4WIC3</b>                                                 | acetyl-CoA acetyltransferase                                   | 0.23 | 0.62 |
| <b>I4WIC4</b>                                                 | 3-hydroxyacyl-CoA dehydrogenase                                | 0.20 | 0.94 |
| <b>I4WJC3</b>                                                 | polyhydroxyalkanoate depolymerase                              | 0.07 | -    |
| <b>I4WKE0</b>                                                 | poly(R)-hydroxyalkanoic acid synthase, class III, PhaC subunit | 0.14 | 0.05 |
| I4WKE1                                                        | poly(R)-hydroxyalkanoic acid synthase subunit                  | 0.05 | -    |
| <b>I4WKH0</b>                                                 | 3-oxoacyl-[acyl-carrier-protein] synthase                      | 0.12 | 0.21 |
| <b>I4WKH1</b>                                                 | acyl carrier protein                                           | 0.11 | -    |
| I4WKH2                                                        | 3-ketoacyl-[acyl-carrier-protein] reductase                    | 0.20 | 0.04 |
| I4WKH3                                                        | malonyl-CoA-acyl carrier protein transacylase                  | 0.14 | 0.31 |
| <b>I4WKH4</b>                                                 | 3-oxoacyl-[acyl-carrier-protein] synthase                      | 0.16 | 0.13 |
| <b>I4WKP8</b>                                                 | acyl-CoA dehydrogenase                                         | -    | 0.04 |
| <b>I4WM78</b>                                                 | acyl-CoA dehydrogenase domain-containing protein               | -    | 0.12 |
| I4WM94                                                        | acyl-CoA dehydrogenase                                         | -    | 0.06 |
| <b>I4WM95</b>                                                 | acyl-CoA dehydrogenase                                         | -    | 0.03 |
| I4WM96                                                        | acetoacetate decarboxylase                                     | 0.20 | 0.13 |
| <b>I4WMY1</b>                                                 | phasin                                                         | 1.86 | 5.43 |
| <b>I4WP46</b>                                                 | trans-2-enoyl-CoA reductase                                    | 0.11 | 0.25 |
| <b>I4WPL0</b>                                                 | enoyl-CoA hydratase                                            | 0.19 | 0.20 |
| I4WPU1                                                        | acyl-CoA dehydrogenase                                         | -    | 0.05 |
| <b>I4WR42</b>                                                 | acyl carrier protein                                           | 0.10 | 0.35 |
| <b>I4WR77</b>                                                 | enoyl-CoA hydratase                                            | 0.08 | -    |
| I4WSC3                                                        | lipase                                                         | 0.08 | 0.20 |
| <b>I4WSG8</b>                                                 | acyl-CoA dehydrogenase                                         | 0.37 | 1.02 |
| <b>I4WU86</b>                                                 | acyl-CoA thiolesterase                                         | -    | 0.16 |
| I4WUC2                                                        | lipase                                                         | -    | 0.07 |
| I4WUD4                                                        | acetoacetyl-CoA reductase                                      | 0.17 | -    |
| <b>I4WZ09</b>                                                 | YdiF, acetate CoA-transferase                                  | 0.13 | -    |
| <b>M4NHA9</b>                                                 | acyl-CoA dehydrogenase                                         | -    | 0.36 |
| <b>Replication, transcription, translation and DNA repair</b> |                                                                |      |      |
| <b>G4FZ48</b>                                                 | elongation factor Tu                                           | 1.83 | 1.03 |
| <b>I4VIS9</b>                                                 | NusG, transcription termination/antitermination protein        | -    | 0.10 |
| <b>I4VIT0</b>                                                 | 50S ribosomal protein L11                                      | 0.43 | 0.43 |
| <b>I4VIT2</b>                                                 | 50S ribosomal protein L10                                      | 0.42 | -    |
| I4VIT3                                                        | 50S ribosomal protein L7/L12                                   | -    | 0.08 |
| <b>I4VK78</b>                                                 | methionine--tRNA ligase                                        | 0.04 | -    |
| <b>I4VLN4</b>                                                 | RNA polymerase sigma factor RpoD                               | 0.04 | 0.03 |
| <b>I4VM70</b>                                                 | 30S ribosomal protein S10                                      | 0.42 | 0.25 |
| <b>I4VM75</b>                                                 | 30S ribosomal protein S19                                      | -    | 0.30 |
| I4VM80                                                        | 30S ribosomal protein S17                                      | 0.45 | -    |
| <b>I4VM82</b>                                                 | 50S ribosomal protein L24                                      | 0.59 | 0.50 |
| I4VM90                                                        | 50S ribosomal protein L15                                      | -    | 0.13 |
| <b>I4VM95</b>                                                 | DNA-directed RNA polymerase subunit alpha                      | -    | 0.42 |



|               |                                                                  |      |      |
|---------------|------------------------------------------------------------------|------|------|
| <b>I4VN96</b> | 30S ribosomal protein S6                                         | -    | 0.22 |
| <b>I4VQ72</b> | 30S ribosomal protein S21                                        | 0.39 | -    |
| <b>I4VS93</b> | 50S ribosomal protein L7/L12                                     | 0.31 | -    |
| <b>I4VWM0</b> | chromosome partition protein                                     | -    | 0.01 |
| <b>I4VXT9</b> | DNA topoisomerase 1                                              | -    | 0.03 |
| <b>I4VZ43</b> | 30S ribosomal protein S11                                        | 0.64 | 0.14 |
| <b>I4VZ44</b> | 30S ribosomal protein S13                                        | -    | 0.38 |
| <b>I4VZ46</b> | 50S ribosomal protein L15                                        | 0.37 | -    |
| <b>I4VZ51</b> | 30S ribosomal protein S8                                         | 1.18 | -    |
| <b>I4VZ55</b> | 50S ribosomal protein L14                                        | 0.50 | 0.77 |
| <b>I4VZ56</b> | 30S ribosomal protein S17                                        | -    | 0.30 |
| <b>I4VZ58</b> | 50S ribosomal protein L16                                        | 0.17 | -    |
| <b>I4VZ59</b> | 30S ribosomal protein S3                                         | 0.13 | 0.25 |
| <b>I4VZC9</b> | 30S ribosomal protein S2                                         | -    | 0.40 |
| <b>I4W0F8</b> | Crp/Fnr family transcriptional regulator                         | 0.07 | -    |
| <b>I4W1I1</b> | amidase                                                          | 0.09 | -    |
| <b>I4W447</b> | RecA                                                             | 0.24 | 0.11 |
| <b>I4W664</b> | N5-glutamine S-adenosyl-L-methionine-dependent methyltransferase | 0.04 | -    |
| <b>I4W6N1</b> | nucleoid DNA-binding protein                                     | 7.00 | 2.85 |
| <b>I4WA42</b> | serine--tRNA ligase                                              | 0.07 | 0.17 |
| <b>I4WAQ1</b> | Fis family transcriptional regulator                             | 0.18 | 0.05 |
| <b>I4WB47</b> | transcriptional regulator                                        | -    | 0.10 |
| <b>I4WBV8</b> | DNA gyrase subunit B                                             | 0.03 | 0.03 |
| <b>I4WBW0</b> | DNA polymerase III subunit beta                                  | 0.66 | 0.32 |
| <b>I4WBX1</b> | tyrosine--tRNA ligase                                            | 0.09 | 0.04 |
| <b>I4WBY3</b> | ArgS, arginine--tRNA ligase                                      | 0.02 | -    |
| <b>I4WC48</b> | chromosome partitioning protein                                  | 0.08 | -    |
| <b>I4WC56</b> | transcriptional regulator                                        | 0.12 | 0.08 |
| <b>I4WCN6</b> | 50S ribosomal protein L28                                        | 0.28 | -    |
| <b>I4WCP9</b> | Rho, transcription termination factor                            | 0.17 | 0.11 |
| <b>I4WCU7</b> | RdgC, recombination-associated protein                           | 0.04 | -    |
| <b>I4WD05</b> | RhlB, ATP-dependent RNA helicase                                 | 0.02 | -    |
| <b>I4WDR8</b> | 50S ribosomal protein L23                                        | -    | 0.23 |
| <b>I4WEH2</b> | phenylalanine--tRNA ligase beta subunit                          | 0.08 | -    |
| <b>I4WEH6</b> | translation initiation factor IF-3                               | 0.31 | -    |
| <b>I4WEI2</b> | 30S ribosomal protein S2                                         | 0.66 | -    |
| <b>I4WEI3</b> | elongation factor Ts                                             | 0.24 | 0.15 |
| <b>I4WF04</b> | NADPH-dependent 7-cyano-7-deazaguanine reductase                 | -    | 0.17 |
| <b>I4WFK0</b> | Glycine--tRNA ligase beta subunit                                | 0.04 | 0.02 |
| <b>I4WG27</b> | 50S ribosomal protein L25                                        | 0.15 | -    |
| <b>I4WGB3</b> | 50S ribosomal protein L1                                         | 0.48 | 0.27 |
| <b>I4WGB4</b> | 50S ribosomal protein L10                                        | 0.34 | 0.26 |

|               |                                                         |      |      |
|---------------|---------------------------------------------------------|------|------|
| <b>I4WGF0</b> | Mg-dependent DNase                                      | 0.07 | 0.25 |
| <b>I4WGM7</b> | DNA topoisomerase 1                                     | 0.06 | -    |
| <b>I4WGT1</b> | aspartate--tRNA ligase                                  | 0.16 | 0.12 |
| <b>I4WHZ5</b> | GreA/GreB family elongation factor                      | 0.20 | 0.20 |
| <b>I4WI04</b> | exodeoxyribonuclease I                                  | -    | 0.03 |
| <b>I4WI69</b> | ribonuclease E                                          | 0.12 | 0.04 |
| <b>I4WI93</b> | GreA, transcription elongation factor                   | 0.29 | 0.24 |
| <b>I4WI99</b> | 30S ribosomal protein S1                                | 0.46 | 0.12 |
| <b>I4WIK9</b> | lysine--tRNA ligase                                     | 0.10 | -    |
| <b>I4WIR1</b> | ribonuclease R                                          | 0.01 | -    |
| <b>I4WIT6</b> | regulatory protein                                      | -    | 0.05 |
| <b>I4WIU3</b> | Hfq, RNA-binding protein                                | 0.41 | -    |
| <b>I4WJD2</b> | glutamine--tRNA ligase                                  | 0.04 | -    |
| <b>I4WJK2</b> | ValS, valine-tRNA ligase                                | 0.06 | -    |
| <b>I4WJK8</b> | proline--tRNA ligase                                    | 0.06 | 0.16 |
| <b>I4WJK9</b> | DNA-binding protein H-NS                                | 3.21 | 0.71 |
| <b>I4WKB9</b> | transcriptional regulator                               | 0.73 | 0.27 |
| <b>I4WKC4</b> | transcription factor                                    | 0.07 | 0.04 |
| <b>I4WKD8</b> | DNA gyrase                                              | 0.05 | 0.03 |
| <b>I4WKE2</b> | polyribonucleotide nucleotidyltransferase               | 0.45 | 1.07 |
| <b>I4WKE6</b> | translation initiation factor IF-2                      | 0.12 | 0.07 |
| <b>I4WKE7</b> | NusA, transcription elongation factor                   | 0.09 | 0.18 |
| <b>I4WKH5</b> | 50S ribosomal protein L32                               | 0.43 | -    |
| <b>I4WKI6</b> | DNA polymerase III                                      | 0.02 | 0.06 |
| <b>I4WKJ2</b> | histidine--tRNA ligase                                  | -    | 0.05 |
| <b>I4WKR3</b> | 50S ribosomal protein L3                                | -    | 0.52 |
| <b>I4WKR6</b> | 50S ribosomal protein L2                                | -    | 0.20 |
| <b>I4WKR7</b> | 30S ribosomal protein S19                               | 0.45 | -    |
| <b>I4WKT0</b> | 30S ribosomal protein S5                                | 0.58 | 0.31 |
| <b>I4WKT6</b> | 30S ribosomal protein S4                                | -    | 0.54 |
| <b>I4WKT7</b> | DNA-directed RNA polymerase subunit alpha               | 0.92 | -    |
| <b>I4WKT8</b> | 50S ribosomal protein L17                               | 0.68 | -    |
| <b>I4WKU7</b> | ribonuclease G                                          | 0.02 | -    |
| <b>I4WL10</b> | elongation factor G                                     | 0.25 | 0.22 |
| <b>I4WL11</b> | 30S ribosomal protein S7                                | 1.41 | 0.56 |
| <b>I4WL13</b> | DNA-directed RNA polymerase subunit beta                | 0.40 | 0.18 |
| <b>I4WL14</b> | DNA-directed RNA polymerase subunit beta                | 0.17 | 0.14 |
| <b>I4WL19</b> | NusG, transcription termination/antitermination protein | 0.52 | -    |
| <b>I4WL23</b> | elongation factor Tu                                    | -    | 0.91 |
| <b>I4WL41</b> | amidase                                                 | 0.04 | 0.02 |
| <b>I4WL46</b> | 30S ribosomal protein S4                                | 0.31 | -    |
| <b>I4WL48</b> | 30S ribosomal protein S13                               | 0.88 | -    |

|               |                                                     |      |      |
|---------------|-----------------------------------------------------|------|------|
| I4WL53        | 50S ribosomal protein L18                           | 0.79 | 0.58 |
| <b>I4WL54</b> | 50S ribosomal protein L6                            | 0.22 | -    |
| <b>I4WL55</b> | 30S ribosomal protein S8                            | -    | 0.75 |
| <b>I4WL57</b> | 50S ribosomal protein L5                            | 0.45 | 0.95 |
| I4WL64        | 50S ribosomal protein L22                           | 0.33 | 0.17 |
| <b>I4WL66</b> | 50S ribosomal protein L2                            | 0.35 | -    |
| <b>I4WL67</b> | 50S ribosomal protein L23                           | 0.64 | -    |
| <b>I4WL68</b> | 50S ribosomal protein L4                            | 0.64 | 0.66 |
| <b>I4WL69</b> | 50S ribosomal protein L3                            | 0.28 | -    |
| <b>I4WM58</b> | isoleucine--tRNA ligase                             | 0.06 | 0.25 |
| <b>I4WMK9</b> | elongation factor P                                 | 0.02 | 0.05 |
| I4WN52        | 30S ribosomal protein S9                            | 0.43 | 0.46 |
| <b>I4WN53</b> | 50S ribosomal protein L13                           | 0.19 | 0.81 |
| <b>I4WN63</b> | Crp, transcriptional regulator                      | 0.11 | -    |
| <b>I4WNH2</b> | 50S ribosomal protein L31 type B                    | 0.15 | -    |
| <b>I4WNH5</b> | endoribonuclease                                    | 0.88 | 1.73 |
| I4WNL3        | 50S ribosomal protein L17                           | -    | 0.53 |
| <b>I4WNP6</b> | ribosome-recycling factor                           | -    | 0.02 |
| <b>I4WP50</b> | MarR family transcriptional regulator               | -    | 0.06 |
| <b>I4WP94</b> | polyhydroxyalkonate synthesis repressor             | 0.21 | -    |
| <b>I4WPI7</b> | RNA-binding protein                                 | 0.23 | -    |
| I4WPL6        | LepA, elongation factor                             | 0.03 | -    |
| <b>I4WPU8</b> | single-stranded DNA-binding protein                 | 0.19 | 1.42 |
| <b>I4WPX4</b> | FusA, elongation factor G                           | -    | 0.07 |
| <b>I4WQ37</b> | transcriptional regulator                           | -    | 0.07 |
| <b>I4WQA4</b> | endoribonuclease                                    | -    | 0.07 |
| <b>I4WQB0</b> | asparagine--tRNA ligase                             | 0.13 | 0.13 |
| <b>I4WQB2</b> | 30S ribosomal protein S6                            | 0.56 | -    |
| I4WQB3        | 30S ribosomal protein S18                           | 0.61 | -    |
| <b>I4WQB4</b> | 50S ribosomal protein L9                            | 1.16 | 0.56 |
| <b>I4WQB9</b> | 30S ribosomal protein S16                           | 0.67 | -    |
| <b>I4WQC2</b> | 50S ribosomal protein L19                           | 0.75 | 0.32 |
| <b>I4WQD3</b> | DksA, RNA polymerase-binding transcription factor   | 0.13 | -    |
| <b>I4WQM0</b> | leucine--tRNA ligase                                | 0.05 | 0.05 |
| <b>I4WRF0</b> | glutamate--tRNA ligase                              | 0.16 | 0.05 |
| <b>I4WT09</b> | ribosomal RNA small subunit methyltransferase       | 0.15 | -    |
| <b>I4WT42</b> | MarR family transcriptional regulator               | 0.32 | 0.06 |
| <b>I4WTM6</b> | cysteine--tRNA ligase                               | 0.04 | -    |
| <b>I4WTZ3</b> | Crp/Fnr family transcriptional regulator            | -    | 0.04 |
| I4WU00        | metallo-beta-lactamase family protein, RNA-specific | 0.02 | 0.04 |
| I4WU53        | regulatory protein                                  | -    | 0.07 |
| I4WUG6        | alanine--tRNA ligase                                | 0.07 | 0.04 |

|                                      |                                                             |      |       |
|--------------------------------------|-------------------------------------------------------------|------|-------|
| <b>I4WYD0</b>                        | poly(A) polymerase I                                        | -    | 0.10  |
| M4NEI0                               | DksA, RNA polymerase-binding protein                        | 0.13 | 0.02  |
| <b>Stress and defense mechanisms</b> |                                                             |      |       |
| I4VQY6                               | hemolysin D                                                 | -    | 0.02  |
| I4VYT9                               | anaerobically induced outer membrane transmembrane protein  | -    | 0.38  |
| <b>I4VZV3</b>                        | thioredoxin                                                 | -    | 0.42  |
| I4W2P1                               | ariflavin resistance protein D                              | -    | 0.02  |
| <b>I4W6N0</b>                        | Lon protease                                                | 0.02 | -     |
| I4W949                               | cold shock protein                                          | 1.63 | 1.25  |
| <b>I4WAB5</b>                        | AhpD, alkyl hydroperoxide reductaseS                        | 0.04 | 0.54  |
| <b>I4WAV1</b>                        | 10 kDa chaperonin                                           | 3.60 | 16.30 |
| <b>I4WAV2</b>                        | 60 kDa chaperonin                                           | 3.14 | 2.01  |
| <b>I4WB26</b>                        | PhoH family protein, phosphate starvation inducible protein | 0.11 | 0.07  |
| <b>I4WB63</b>                        | GTP-binding protein TypA/BipA                               | 0.04 | -     |
| <b>I4WBN4</b>                        | stringent starvation protein                                | 0.17 | -     |
| <b>I4WBS7</b>                        | ATP-dependent protease ATPase subunit HslU                  | 0.46 | 0.26  |
| I4WC57                               | salt-induced outer membrane protein                         | 0.38 | 0.48  |
| <b>I4WDA1</b>                        | OsmC-like protein                                           | -    | 0.07  |
| I4WDM9                               | thioredoxin reductase                                       | 0.13 | 0.07  |
| I4WE54                               | anaerobically induced outer membrane protein                | 0.63 | 1.69  |
| <b>I4WEF2</b>                        | aminoglycoside phosphotransferase                           | -    | 0.01  |
| I4WEG4                               | PsiF repeat family protein                                  | 0.33 | -     |
| <b>I4WEU5</b>                        | acriflavin resistance protein                               | 0.03 | 0.05  |
| <b>I4WEZ6</b>                        | CRISPR-associated protein Csd2 family                       | -    | 0.06  |
| <b>I4WFB4</b>                        | CRISPR-associated protein                                   | -    | 0.12  |
| I4WG36                               | thiol-disulfide isomerase-like thioredoxin                  | 0.24 | 0.18  |
| <b>I4WG89</b>                        | chaperonin                                                  | -    | 0.08  |
| <b>I4WGC1</b>                        | anaerobically induced outer membrane protein                | 0.04 | 0.52  |
| I4WGS4                               | chaperone                                                   | 0.12 | 0.06  |
| <b>I4WI84</b>                        | GrpE, chaperone                                             | 0.21 | 0.79  |
| <b>I4WI86</b>                        | DnaK, chaperone                                             | 0.54 | 0.88  |
| I4WIA8                               | beta-lactamase                                              | 0.11 | -     |
| I4WIQ0                               | HflD, high frequency lysogenization protein                 | 0.11 | -     |
| <b>I4WIV8</b>                        | alkyl hydroperoxide reductase                               | 1.55 | 2.60  |
| <b>I4WJB1</b>                        | carbon starvation protein                                   | -    | 0.02  |
| <b>I4WJR0</b>                        | superoxide dismutase                                        | 0.76 | 5.60  |
| I4WKI2                               | starvation-inducible outer membrane lipoprotein             | 1.05 | 1.02  |
| I4WMA1                               | starvation-inducible lipoprotein                            | 0.19 | -     |
| <b>I4WPF1</b>                        | activator of Hsp90 ATPase 1 family protein                  | -    | 0.44  |
| <b>I4WQL5</b>                        | thioredoxin                                                 | 0.19 | 0.27  |
| <b>I4WRQ8</b>                        | AhpD, alkyl hydroperoxide reductase                         | 0.23 | -     |
| I4WSK9                               | SurA, chaperone                                             | 0.41 | 1.25  |

|                                        |                                                     |      |      |
|----------------------------------------|-----------------------------------------------------|------|------|
| <b>I4WUA1</b>                          | thioredoxin                                         | 0.22 | 0.13 |
| I4WUC5                                 | cold shock protein                                  | 0.38 | -    |
| I4WUC6                                 | cold shock protein                                  | 2.69 | -    |
| <b>I4WUD7</b>                          | HtpG, chaperone protein                             | 0.31 | 0.22 |
| <b>I4WUF3</b>                          | catalase                                            | 0.31 | 0.82 |
| <b>I4WYA6</b>                          | competence/damage-inducible protein CinA-like       | -    | 0.12 |
| <b>Transport, secretion and efflux</b> |                                                     |      |      |
| <b>I4VLQ8</b>                          | bacterioferritin                                    | 0.19 | -    |
| <b>I4VNB1</b>                          | YajC, preprotein translocase subunit                | -    | 0.38 |
| <b>I4VRS1</b>                          | sortase system response regulator                   | 0.08 | 0.10 |
| <b>I4VUA8</b>                          | ExbB, biopolymer transport protein                  | -    | 0.31 |
| <b>I4VUA9</b>                          | TonB family protein                                 | 0.65 | -    |
| <b>I4VVG8</b>                          | translocase subunit SecA                            | 0.05 | 0.03 |
| <b>I4VYG3</b>                          | FtsY, signal recognition particle receptor          | -    | 0.06 |
| <b>I4VYN0</b>                          | TolQ protein                                        | 0.14 | 0.16 |
| I4VYN5                                 | YbgF, Tol-pal system protein                        | -    | 0.05 |
| <b>I4W0B9</b>                          | FtsY, signal recognition particle receptor          | 0.07 | -    |
| I4W1W5                                 | Oar protein                                         | -    | 0.02 |
| I4W345                                 | outer membrane receptor protein                     | 0.03 | -    |
| <b>I4W9D2</b>                          | twin arginine-targeting protein translocase         | -    | 0.36 |
| I4WAP8                                 | TonB-dependent receptor                             | 0.03 | 0.15 |
| <b>I4WBA3</b>                          | bacterioferritin                                    | -    | 0.36 |
| <b>I4WBV4</b>                          | ExbD1, biopolymer transport protein                 | 0.03 | 0.30 |
| <b>I4WBV5</b>                          | ExbB, biopolymer transport protein                  | 1.25 | -    |
| I4WBW4                                 | YidC, insertase                                     | 0.04 | -    |
| I4WBX8                                 | ABC transporter                                     | 0.19 | -    |
| I4WC41                                 | TonB dependent receptor protein                     | -    | 0.02 |
| I4WDN2                                 | LolA, outer-membrane lipoprotein carrier protein    | 0.31 | 0.52 |
| <b>I4WDU8</b>                          | bacterioferritin                                    | 0.14 | -    |
| I4WDV1                                 | TolC family type I secretion outer membrane protein | 0.63 | 0.81 |
| I4WDW0                                 | Na <sup>+</sup> /proline symporter                  | 0.06 | 0.05 |
| I4WE23                                 | TonB-dependent outer membrane receptor protein      | 0.67 | 1.61 |
| <b>I4WEF4</b>                          | SecF, protein-export membrane protein               | -    | 0.06 |
| I4WEF5                                 | SecD, translocase                                   | 0.04 | 0.09 |
| I4WEQ9                                 | TonB-dependent receptor                             | 0.33 | 0.34 |
| I4WEU4                                 | RND family efflux transporter                       | 0.29 | 0.18 |
| I4WEX9                                 | TonB-dependent receptor                             | 0.35 | 0.33 |
| I4WFK2                                 | ferrienterochelin and colicin receptor              | 1.44 | 1.75 |
| I4WFT1                                 | cobalamin receptor protein                          | 0.19 | 0.29 |
| <b>I4WG81</b>                          | TonB protein                                        | 0.30 | 0.14 |
| I4WGD3                                 | TonB family protein                                 | 0.06 | 0.13 |
| I4WGD5                                 | OmpB-like                                           | 2.90 | 3.24 |

|               |                                                             |      |      |
|---------------|-------------------------------------------------------------|------|------|
| I4WGD6        | autotransorter                                              | -    | 0.13 |
| I4WGS8        | ferric enterobactin receptor                                | 0.04 | 0.14 |
| <b>I4WGU0</b> | TolR protein                                                | -    | 0.09 |
| I4WGU2        | TolB                                                        | 0.36 | 0.26 |
| I4WH55        | TonB-dependent siderophore receptor                         | 0.11 | 0.17 |
| <b>I4WH99</b> | sodium ABC transporter ATP-binding protein                  | -    | 0.07 |
| <b>I4WHB0</b> | ABC transporter ATP-binding protein                         | -    | 0.06 |
| I4WHD4        | long chain fatty acid transport protein                     | 0.12 | 0.25 |
| I4WIQ1        | porin                                                       | 0.13 | 0.26 |
| I4WIQ3        | PstS, phosphate-binding protein                             | 0.74 | 0.76 |
| <b>I4WIQ6</b> | PstB, phosphate import ATP-binding protein                  | -    | 0,05 |
| <b>I4WIQ7</b> | PhoU, phosphate-specific transport system accessory protein | 0.54 | -    |
| I4WIX0        | TonB-dependent receptor                                     | 0.07 | 0.04 |
| I4WJ71        | TonB-dependent receptor                                     | 0.14 | 0.20 |
| <b>I4WJJ4</b> | preprotein translocase                                      | 0.21 | -    |
| I4WJQ5        | TonB-dependent outer membrane receptor                      | 0.13 | 0.24 |
| I4WJU6        | TonB dependent receptor protein                             | 0.23 | 0.34 |
| I4WL02        | outer membrane efflux protein                               | -    | 0.04 |
| I4WM79        | hydrophobe/amphiphile efflux-1 (HAE1) family transporter    | 0.05 | 0.05 |
| I4WM80        | multidrug resistance protein                                | 0.23 | 0.12 |
| I4WNG4        | type IV pilus secretin                                      | 0.34 | 0.05 |
| I4WNI0        | ABC transporter auxiliary protein                           | 0.76 | 0.70 |
| <b>I4WNI1</b> | ABC transporter periplasmic protein                         | 0.10 | 0.05 |
| <b>I4WNI3</b> | ABC transporter                                             | 0.03 | 0.12 |
| I4WP57        | ABC transporter permease                                    | -    | 0.02 |
| <b>I4WP96</b> | efflux pump membrane protein                                | 0.05 | 0.05 |
| <b>I4WPE6</b> | RNA signal recognition particle 4.5S RNA                    | -    | 0.19 |
| <b>I4WPJ0</b> | trigger factor                                              | -    | 0.05 |
| I4WPL7        | signal peptidase                                            | -    | 0.05 |
| I4WPX5        | TonB-dependent receptor                                     | 0.03 | 0.04 |
| I4WQ75        | TonB-dependent receptor protein                             | 0.08 | 0.08 |
| <b>I4WR37</b> | hemolysin D                                                 | 0.32 | 0.11 |
| I4WRP8        | sugar transporter                                           | -    | 0.07 |
| I4WRR8        | outer membrane protein                                      | 0.20 | 0.26 |
| <b>I4WSA6</b> | ferritin                                                    | 0.50 | 0.21 |
| <b>I4WSX0</b> | ABC-type transporter                                        | 0.11 | 0.08 |
| I4WSX8        | Fe <sup>2+</sup> -dicitrate sensor                          | 0.08 | 0.11 |
| <b>I4WT49</b> | RND family efflux transporter                               | 0.07 | -    |
| I4WTY3        | TonB-dependent outer membrane receptor                      | 0.12 | 0.07 |
| I4WU14        | efflux pump membrane fusion protein                         | 0.09 | 0.04 |
| I4WU70        | polyketide cyclase/dehydrase and lipid transport            | 0.73 | 1.13 |
| I4WUB7        | metal ion ABC transporter substrate-binding protein         | 0.90 | 0.66 |
| I4WUE7        | TonB-dependent siderophore receptor                         | 0.08 | 0.12 |

|                        |                                                                                                |      |      |
|------------------------|------------------------------------------------------------------------------------------------|------|------|
| I4WWB0                 | outer membrane cobalamin receptor protein                                                      | 0.33 | -    |
| <b>I4WZB9</b>          | ABC transporter ATP-binding protein                                                            | 0.09 | -    |
| <b>Other functions</b> |                                                                                                |      |      |
| I4VJ32                 | serine/threonine phosphatase with Cache sensor                                                 | -    | 0.01 |
| I4VJL1                 | dTDP-glucose 4.6-dehydratase                                                                   | -    | 0.05 |
| I4VKW0                 | Cell division protein                                                                          | 0.10 | -    |
| <b>I4VP03</b>          | MoxR-like ATPase                                                                               | -    | 0.06 |
| I4VPB8                 | modulator of FtsH protease                                                                     | 0.29 | -    |
| I4VPN3                 | cell division protein                                                                          | -    | 0.04 |
| I4VPP0                 | partition protein                                                                              | -    | 0.11 |
| <b>I4VQ36</b>          | FtsE, cell division ATP-binding protein                                                        | 0.04 | -    |
| <b>I4VQR5</b>          | MreB, rod shape-determining protein                                                            | -    | 0.11 |
| <b>I4VTQ2</b>          | AMP nucleosidase                                                                               | -    | 0.09 |
| <b>I4VV38</b>          | response regulator consisting of a CheY-like receiver domain and a Fis-type HTH domain protein | 0.18 | -    |
| <b>I4VV66</b>          | PilH, two-component system response regulatory protein                                         | 0.18 | -    |
| <b>I4VV67</b>          | response regulator receiver protein                                                            | 0.42 | -    |
| <b>I4VXH1</b>          | two-component system response regulator protein                                                | 0.12 | 0.06 |
| <b>I4VZJ1</b>          | response regulator receiver domain-containing protein                                          | -    | 0.27 |
| <b>I4W0C6</b>          | NTP pyrophosphohydrolase                                                                       | -    | 0.07 |
| <b>I4W2S6</b>          | ribose-phosphate pyrophosphokinase                                                             | 0.12 | -    |
| <b>I4W459</b>          | sulfate adenylyltransferase subunit 2                                                          | -    | 0.04 |
| <b>I4W782</b>          | protein kinase                                                                                 | -    | 0.02 |
| <b>I4W8Y5</b>          | amidohydrolase                                                                                 | -    | 0.11 |
| <b>I4W9N8</b>          | glutathione S-transferase                                                                      | -    | 0.02 |
| <b>I4W9N9</b>          | adenylosuccinate lyase                                                                         | -    | 0.21 |
| <b>I4W9T6</b>          | methyltransferase                                                                              | -    | 0.16 |
| <b>I4WAH3</b>          | HemC, porphobilinogen deaminase                                                                | 0.16 | -    |
| I4WAT9                 | PurH, bifunctional purine biosynthesis protein                                                 | 0.09 | 0.04 |
| <b>I4WAZ7</b>          | ObgE, GTPase                                                                                   | 0.04 | -    |
| I4WB46                 | metal-dependent amidohydrolase                                                                 | 0.10 | 0.11 |
| <b>I4WB49</b>          | amidohydrolase                                                                                 | -    | 0.08 |
| I4WBQ6                 | 5'-nucleotidase domain-containing protein                                                      | 0.03 | -    |
| <b>I4WBV2</b>          | PdxJ, pyridoxine 5'-phosphate synthase                                                         | 0.15 | -    |
| I4WBZ2                 | partition protein                                                                              | 0.17 | -    |
| I4WCC3                 | alkaline phosphatase                                                                           | -    | 0.03 |
| I4WCC6                 | 5'-nucleotidase domain-containing protein                                                      | 0.08 | 0.04 |
| <b>I4WCF1</b>          | thymidylate synthase                                                                           | 0.08 | 0.23 |
| <b>I4WCF2</b>          | dihydrofolate reductase                                                                        | 0.28 | -    |
| I4WCL9                 | Amidohydrolase                                                                                 | -    | 0.04 |
| <b>I4WCM6</b>          | thymidine kinase                                                                               | -    | 0.09 |
| <b>I4WCP1</b>          | haloacid dehalogenase-like hydrolase                                                           | -    | 0.20 |

|               |                                                                          |      |      |
|---------------|--------------------------------------------------------------------------|------|------|
| I4WCP5        | delta-aminolevulinic acid dehydratase                                    | 0.06 | 0.49 |
| <b>I4WCP7</b> | dihydroorotase                                                           | 0.12 | 0.39 |
| <b>I4WCP8</b> | glutamate--cysteine ligase                                               | 0.04 | 0.17 |
| <b>I4WD04</b> | thioredoxin                                                              | 0.17 | -    |
| I4WD67        | methyltransferase                                                        | 0.09 | -    |
| I4WD71        | metallo carboxipeptidase                                                 | 0.04 | -    |
| <b>I4WDN1</b> | FtsK, DNA segregation ATPase                                             | -    | 0.02 |
| <b>I4WDT2</b> | thiamine-phosphate synthase                                              | 0.11 | -    |
| I4WDT3        | HemL, glutamate-1-semialdehyde 2.1-aminomutase                           | 0.10 | 0.12 |
| I4WDT9        | Adk, adenylate kinase                                                    | 1.53 | 1.18 |
| <b>I4WDU5</b> | inorganic pyrophosphatase                                                | 0.08 | 0.50 |
| <b>I4WDV0</b> | L-isoaspartate carboxylmethyltransferase                                 | -    | 0.13 |
| I4WDW1        | lipid/polyisoprenoid binding protein                                     | 2.76 | 1.19 |
| <b>I4WE19</b> | aspartyl/asparaginyl beta-hydroxylase                                    | 0.02 | -    |
| <b>I4WE39</b> | NAD-dependent epimerase/dehydratase                                      | 0.11 | 0.48 |
| <b>I4WE90</b> | response regulator with CheY-like receiver domain                        | 0.69 | 0.29 |
| <b>I4WEG5</b> | uracil phosphoribosyltransferase                                         | 0.09 | -    |
| <b>I4WEI4</b> | uridylate kinase                                                         | 0.08 | 0.12 |
| <b>I4WF02</b> | glutathione S-transferase                                                | 0.21 | -    |
| <b>I4WF09</b> | MreB, rod shape-determining protein                                      | 0.25 | -    |
| <b>I4WF36</b> | UbiB, kinase                                                             | 0.02 | -    |
| <b>I4WF93</b> | oxygen-dependent coproporphyrinogen-III oxidase                          | -    | 0.22 |
| I4WF97        | N-acyl-L-amino acid amidohydrolase                                       | -    | 0.04 |
| I4WFD4        | amidohydrolase                                                           | 0.02 | 0.02 |
| I4WG63        | acetyl transferase                                                       | -    | 0.03 |
| I4WG75        | amidase                                                                  | -    | 0.03 |
| <b>I4WG76</b> | sulfate adenylyltransferase                                              | 0.17 | -    |
| <b>I4WG77</b> | bifunctional sulfate adenylyltransferase /adenylylsulfate kinase protein | 0.24 | 0.10 |
| <b>I4WG87</b> | signal transduction protein                                              | 0.20 | 0.10 |
| I4WGC2        | formylglycine-generating sulfatase family protein                        | 0.39 | 0.29 |
| I4WGC3        | SCO1 /SenC family protein                                                | 0.36 | -    |
| <b>I4WGC5</b> | thiol peroxidase                                                         | 0.21 | 0.29 |
| I4WGP6        | glutamine cyclotransferase                                               | 0.14 | 0.24 |
| <b>I4WGV1</b> | laccase-domain protein                                                   | 0.36 | -    |
| <b>I4WH93</b> | RmuC domain-containing protein                                           | 0.05 | 0.03 |
| <b>I4WH94</b> | GTP cyclohydrolase                                                       | 0.33 | 0.04 |
| I4WHH6        | uroporphyrin-III C-methyltransferase                                     | 0.28 | -    |
| <b>I4WIB5</b> | pirin                                                                    | 0.10 | 0.34 |
| <b>I4WIC6</b> | nucleoside diphosphate kinase                                            | 0.63 | 1.53 |
| <b>I4WID0</b> | GTP binding protein                                                      | 0.19 | 0.13 |
| <b>I4WID4</b> | inosine-5'-monophosphate dehydrogenase                                   | -    | 0.10 |
| <b>I4WID5</b> | GMP synthase                                                             | 0.05 | -    |



|               |                                                              |      |      |
|---------------|--------------------------------------------------------------|------|------|
| <b>I4WIK5</b> | ZipA, cell division protein                                  | 0.08 | -    |
| <b>I4WIM0</b> | TraB, pheromone shutdown-related protein                     | 0.03 | -    |
| <b>I4WIN6</b> | histone-like protein                                         | 3.65 | 1.50 |
| <b>I4WIT8</b> | adenylosuccinate synthetase                                  | 0.24 | 0.21 |
| <b>I4WIV3</b> | 2-methylcitrate dehydratase                                  | 0.16 | 0.32 |
| <b>I4WJ80</b> | acetylornithine aminotransferase                             | -    | 0.19 |
| <b>I4WJ85</b> | Parathion hydrolase                                          | 0.03 | -    |
| <b>I4WJ96</b> | 6,7-dimethyl-8-ribityllumazine synthase                      | 0.22 | -    |
| <b>I4WJ97</b> | L.D-carboxypeptidase A                                       | 0.06 | 0.21 |
| <b>I4WJ98</b> | 3,4-dihydroxy-2-butanone 4-phosphate synthase                | 0.06 | 0.10 |
| <b>I4WJA5</b> | orotidine 5'-phosphate decarboxylase                         | -    | 0.05 |
| <b>I4WJB8</b> | phosphoribosylformylglycinamidine synthase                   | -    | 0.02 |
| <b>I4WJQ4</b> | Rossmann fold nucleotide-binding protein                     | -    | 0.07 |
| <b>I4WJR1</b> | N5-carboxyaminoimidazole ribonucleotide synthase             | 0.11 | -    |
| <b>I4WJR2</b> | N5-carboxyaminoimidazole ribonucleotide mutase               | 0.28 | -    |
| <b>I4WJS9</b> | adenosylmethionine-8-amino-7-oxononanoate aminotransferase   | -    | 0.04 |
| <b>I4WJT2</b> | chemotaxis-related protein                                   | 0.25 | 0.03 |
| <b>I4WJT6</b> | chemotaxis signal transduction protein pili                  | -    | 0.10 |
| <b>I4WJT9</b> | glutathione synthetase                                       | 0.08 | -    |
| <b>I4WJU3</b> | aspartate carbamoyltransferase                               | 0.13 | 0.01 |
| <b>I4WJU7</b> | twitching motility protein                                   | -    | 0.02 |
| <b>I4WJU8</b> | twitching motility protein                                   | 0.28 | 0.09 |
| <b>I4WKD1</b> | response regulator receiver protein                          | 0.54 | 0.12 |
| <b>I4WKD2</b> | DnaJ-class molecular chaperone                               | 0.11 | -    |
| <b>I4WKH9</b> | MoxR-like ATPase                                             | 0.04 | -    |
| <b>I4WKI3</b> | diadenosine tetraphosphate hydrolase                         | -    | 0.38 |
| <b>I4WMK7</b> | 2-amino-3-carboxymuconate-6-semialdehyde decarboxylase       | -    | 0.05 |
| <b>I4WNA1</b> | phosphoribosylaminoimidazole-succinocarboxamide synthase     | 0.14 | 0.03 |
| <b>I4WNG3</b> | MoxR-like ATPase                                             | 0.11 | -    |
| <b>I4WNH3</b> | inosine-uridine nucleoside N-ribohydrolase                   | -    | 0.12 |
| <b>I4WNV0</b> | sulfatase-modifying factor protein                           | 0.05 | -    |
| <b>I4WP91</b> | 2-polyprenyl-6-methoxyphenol hydroxylase-like oxidoreductase | 0.04 | -    |
| <b>I4WPE1</b> | 3-demethylubiquinone-9 3-methyltransferase                   | -    | 0.26 |
| <b>I4WPF7</b> | glutathione S-transferase                                    | -    | 0.10 |
| <b>I4WPG0</b> | penicillin acylase                                           | -    | 0.02 |
| <b>I4WPG1</b> | succinate-CoA transferase                                    | 0.04 | 0.04 |
| <b>I4WPG2</b> | 3-demethylubiquinone-9 3-methyltransferase                   | -    | 0.33 |
| <b>I4WPH2</b> | PyrG, CTP synthase                                           | 0.10 | -    |
| <b>I4WPJ1</b> | ATP-dependent Clp protease                                   | 0.24 | 0.87 |
| <b>I4WPM8</b> | hypoxanthine-guanine phosphoribosyltransferase               | 0.12 | 0.10 |
| <b>I4WPM9</b> | S-methyl-5'-thioinosine phosphorylase                        | -    | 0.11 |
| <b>I4WPV1</b> | geranylgeranyl pyrophosphate synthase                        | 0.06 | 0.15 |

|               |                                                                              |      |      |
|---------------|------------------------------------------------------------------------------|------|------|
| I4WPV4        | polyisoprenoid-binding protein                                               | -    | 0.08 |
| I4WPW4        | polyisoprenoid-binding protein                                               | 0.05 | 0.05 |
| <b>I4WQ95</b> | S-formylglutathione hydrolase                                                | -    | 0.07 |
| I4WQC3        | PAS/PAC sensor-containing diguanylate cyclase/phosphodiesterase              | 0.07 | 0.07 |
| <b>I4WQC8</b> | UbiG, ubiquinone biosynthesis O-methyltransferase                            | 0.08 | -    |
| <b>I4WQL8</b> | PqiB family protein                                                          | 0.05 | 0.03 |
| <b>I4WRC2</b> | carboxymethylenebutenolidase                                                 | 0.25 | -    |
| I4WRC7        | ATPase                                                                       | 0.05 | 0.04 |
| <b>I4WRK0</b> | bifunctional folylpolyglutamate synthase/dihydrofolate synthase              | 0.03 | -    |
| I4WRN4        | isoprenoid biosynthesis protein                                              | 0.18 | 0.14 |
| <b>I4WSD6</b> | nucleotide-binding protein                                                   | 0.03 | -    |
| I4WSL8        | GTP binding protein                                                          | 0.04 | -    |
| <b>I4WSY2</b> | response regulator with CheY-like receiver domain                            | 0.36 | 0.26 |
| <b>I4WSY8</b> | adenosylhomocysteinase                                                       | -    | 0.03 |
| <b>I4WSZ6</b> | S-adenosylmethionine synthase                                                | 0.14 | 0.28 |
| I4WT06        | LppC family lipoprotein                                                      | 0.13 | 0.16 |
| <b>I4WT08</b> | MraZ, transcriptional regulator                                              | 0.24 | 0.12 |
| I4WU93        | acetyl transferase                                                           | 0.23 | -    |
| I4WUC9        | pirin                                                                        | 0.23 | 0.11 |
| <b>I4WV01</b> | phosphoglycerol transferase family protein, alkaline phosphatase superfamily | -    | 0.04 |
| I4WV06        | pteridine reductase                                                          | -    | 0.11 |
| I4WVE3        | disulfide isomerase                                                          | 0.24 | 0.53 |
| I4WVE4        | thiol:disulfide interchange protein                                          | 0.17 | 0.19 |
| I4WVX6        | (p)ppGpp synthetase                                                          | -    | 0.01 |
| <b>I4WXN8</b> | inosine-5'-monophosphate dehydrogenase                                       | 0.07 | -    |
| I4WYH0        | N5-carboxyaminoimidazole ribonucleotide synthase                             | -    | 0.04 |
| M4NDJ5        | heme biosynthesis enzyme                                                     | -    | 0.05 |

#### Function unknown

|               |  |      |      |
|---------------|--|------|------|
| I4VQ20        |  | -    | 0.19 |
| I4VSJ4        |  | 0.04 | -    |
| I4VV34        |  | -    | 0.35 |
| <b>I4W9G3</b> |  | -    | 0.06 |
| I4W9L9        |  | 0.21 | -    |
| I4WAA1        |  | 0.81 | 0.23 |
| I4WB04        |  | 0.08 | 0.05 |
| I4WB10        |  | 0.21 | 0.44 |
| I4WB40        |  | 0.10 | -    |
| I4WBM4        |  | -    | 0.02 |
| <b>I4WBS3</b> |  | 0.25 | 0.32 |
| I4WBT2        |  | 0.06 | 0.06 |
| I4WBV7        |  | 0.72 | 0.44 |

|               |      |      |
|---------------|------|------|
| I4WC23        | -    | 0.50 |
| I4WC53        | -    | 0.07 |
| <b>I4WCF0</b> | 0.09 | -    |
| I4WD84        | 0.11 | 0.13 |
| <b>I4WDU6</b> | 0.28 | 0.20 |
| <b>I4WDZ3</b> | 0.11 | -    |
| I4WDZ5        | 0.09 | 0.19 |
| I4WE01        | 0.09 | -    |
| I4WE02        | 0.15 | -    |
| <b>I4WE09</b> | 0.15 | -    |
| <b>I4WE16</b> | 0.17 | 0.12 |
| I4WEN9        | -    | 0.14 |
| <b>I4WEU3</b> | 0.57 | 2.33 |
| I4WEX6        | 0.01 | 0.01 |
| I4WF92        | -    | 0.09 |
| I4WF94        | 0.45 | 0.02 |
| <b>I4WFK9</b> | 0.14 | -    |
| I4WFL9        | 0.02 | 0.01 |
| <b>I4WFM7</b> | 5.89 | 9.61 |
| <b>I4WG57</b> | -    | 0.03 |
| I4WG83        | 0.26 | -    |
| I4WG92        | 0.13 | 0.03 |
| I4WGK8        | 0.05 | 0.45 |
| I4WGK9        | 1.02 | 0.17 |
| <b>I4WH42</b> | -    | 0.16 |
| I4WH59        | 0.08 | 0.03 |
| <b>I4WHT8</b> | 0.06 | 0.16 |
| I4WJA7        | -    | 0.06 |
| I4WJS3        | 0.28 | 0.36 |
| I4WJU4        | 0.15 | 0.10 |
| <b>I4WM37</b> | 0.10 | -    |
| <b>I4WMC4</b> | -    | 0.14 |
| I4WMK6        | 0.50 | 0.67 |
| I4WN45        | 0.15 | -    |
| <b>I4WN49</b> | 0.21 | -    |
| <b>I4WNI6</b> | -    | 0.14 |
| <b>I4WNX0</b> | -    | 0.01 |
| I4WPE8        | 0.15 | 0.14 |
| <b>I4WPL8</b> | 0.21 | -    |
| I4WPM4        | 0.25 | -    |
| I4WQL9        | 0.08 | 0.13 |
| <b>I4WQS0</b> | 0.08 | -    |
| I4WRB7        | 0.59 | 0.35 |

|               |      |      |
|---------------|------|------|
| I4WRC0        | 0.38 | 0.26 |
| <b>I4WRF9</b> | 0.64 | 0.14 |
| I4WRK1        | -    | 0.06 |
| I4WRN7        | -    | 0.02 |
| <b>I4WRW1</b> | -    | 0.04 |
| I4WRX1        | 0.69 | 1.28 |
| I4WSB0        | 0.14 | 0.08 |
| I4WSB4        | -    | 0.11 |
| I4WSM6        | 0.01 | 0.01 |
| I4WSW9        | 0.07 | -    |
| I4WU94        | 0.19 | -    |
| <b>I4WUA7</b> | 0.28 | -    |
| I4WUC4        | 0.44 | 0.16 |
| I4WUE0        | 0.28 | -    |
| I4WYZ8        | 0.39 | -    |

---

<sup>a</sup> Data are the mean of two replicates.

<sup>b</sup> Proteins in bold characters have a predicted intracellular localization.

<sup>c</sup> Protein not detected or protein identification not considered valid.

**Table S3** Proteins produced by *Myxococcus xanthus* DK 1622 during growth in minimal medium supplemented with suberin at day 5 and day 25

| Uniprot accession number     | Putative function                          | Abundance (NSpC <sup>a</sup> ) |                |
|------------------------------|--------------------------------------------|--------------------------------|----------------|
|                              |                                            | 5 days                         | 25 days        |
| <b>Amino acid metabolism</b> |                                            |                                |                |
| Q1D8A6                       | penicillin acylase                         | 0.18                           | 0.11           |
| Q1D5W7                       | peptidase                                  | 0.27                           | 0.03           |
| <b>Q1D4C2<sup>b</sup></b>    | Glu/Leu/Phe/Val dehydrogenase              | 0.36                           | 0.04           |
| Q1D7P1                       | peptidase                                  | 0.24                           | - <sup>c</sup> |
| <b>PNP</b>                   | Glu/Leu/Phe/Val dehydrogenase              | 0.28                           | -              |
| Q1D9F6                       | peptidase                                  | 0.30                           | -              |
| Q1DBU7                       | peptidase                                  | 0.29                           | 0.14           |
| <b>Q1D215</b>                | aminotransferase                           | 0.22                           | 0.22           |
| <b>Q1DAS8</b>                | prolyl endopeptidase                       | 0.22                           | 0.04           |
| <b>Q1DAR8</b>                | Xaa-Pro aminopeptidase                     | 0.19                           | 0.04           |
| <b>Q1CXD4</b>                | peptidase                                  | 0.18                           | 0.23           |
| <b>Q1DAQ9</b>                | Cys/Met metabolism PLP-dependent enzyme    | 0.19                           | 0.11           |
| Q1DBU8                       | peptidase                                  | 0.22                           | 0.08           |
| <b>Q1D7X2</b>                | glycine dehydrogenase                      | 0.16                           | 0.05           |
| <b>Q1CY03</b>                | peptidase                                  | 0.15                           | -              |
| Q1CZK0                       | peptidase                                  | 0.13                           | -              |
| Q1DD17                       | peptidase                                  | 0.27                           | 0.20           |
| <b>Q1DC00</b>                | cysteine synthase                          | 0.29                           | 0.39           |
| <b>Q1CZV8</b>                | 4-hydroxy-tetrahydrodipicolinate synthase  | 0.21                           | -              |
| <b>Q1D6Z0</b>                | aspartate aminotransferase                 | 0.12                           | -              |
| Q1D7L0                       | peptidase                                  | 0.15                           | -              |
| <b>Q1D4A7</b>                | urocanate hydratase                        | 0.24                           | -              |
| <b>Q1D827</b>                | branched-chain amino acid aminotransferase | 0.13                           | -              |
| <b>Q1CWK6</b>                | peptidase                                  | 0.26                           | -              |
| Q1CZV3                       | peptidase                                  | 0.19                           | 0.07           |
| <b>GLYA</b>                  | serine hydroxymethyltransferase            | 0.18                           | -              |
| <b>Q1D3P1</b>                | 2-oxoisovalerate dehydrogenase             | 0.19                           | 0.24           |
| Q1D9S1                       | aminopeptidase                             | 0.10                           | 0.10           |
| Q1DER8                       | serine protease                            | 0.16                           | 0.05           |
| <b>METK</b>                  | S-adenosylmethionine synthase              | 0.11                           | -              |
| Q1D5T1                       | peptidase                                  | 0.11                           | -              |
| <b>Q1DEW1</b>                | peptidase                                  | 0.18                           | -              |
| <b>Q1D3P0</b>                | 2-oxoisovalerate dehydrogenase             | 0.10                           | -              |
| <b>HUTH</b>                  | histidine ammonia-lyase                    | 0.08                           | -              |
| Q1CWF2                       | peptidase                                  | 0.09                           | -              |
| Q1D6F2                       | peptidyl-dipeptidase                       | 0.14                           | -              |
| <b>Q1DDV0</b>                | glutamine synthetase                       | 0.10                           | 0.07           |
| <b>Q1DAV7</b>                | peptidase                                  | 0.13                           | 0.02           |
| <b>Q1DFN7</b>                | peptidase                                  | 0.15                           | 0.21           |

|               |                                              |      |      |
|---------------|----------------------------------------------|------|------|
| <b>SAHH</b>   | adenosylhomocysteinase                       | 0.12 | -    |
| Q1DDP8        | peptidase.                                   | 0.11 | -    |
| <b>Q1CZZ5</b> | 1-pyrroline-5-carboxylate dehydrogenase      | 0.12 | -    |
| <b>Q1D2E3</b> | peptidase                                    | 0.13 | -    |
| <b>Q1D4V2</b> | alanine dehydrogenase                        | 0.11 | -    |
| <b>Q1D2K4</b> | aminopeptidase                               | 0.07 | -    |
| Q1CZD2        | zinc metalloprotease                         | 0.10 | -    |
| <b>Q1CYE6</b> | arginine N-succinyltransferase               | 0.05 | -    |
| <b>CARB</b>   | carbamoyl-phosphate synthase                 | 0.09 | -    |
| <b>HSLU</b>   | ATP-dependent protease                       | 0.10 | 0.17 |
| <b>Q1CYQ0</b> | fumarylacetoacetate hydrolase                | 0.13 | 0.13 |
| Q1DBS1        | chymotrypsin                                 | 0.10 | -    |
| F8CLH1        | aspartate-semialdehyde dehydrogenase         | 0.03 | -    |
| Q1D9N1        | peptidase                                    | 0.05 | -    |
| Q1DEY9        | dipeptidyl peptidase                         | 0.05 | -    |
| Q1DAK3        | peptidase                                    | 0.08 | -    |
| <b>ASTB</b>   | N-succinylarginine dihydrolase               | 0.06 | -    |
| Q1DA13        | peptidase                                    | 0.06 | -    |
| <b>Q1DAQ3</b> | cystathionine beta-synthase                  | 0.06 | -    |
| <b>Q1D625</b> | peptidase                                    | 0.05 | -    |
| Q1D624        | peptidase                                    | 0.05 | -    |
| Q1DG40        | peptidase                                    | 0.06 | -    |
| <b>Q1D459</b> | L-erythro-3,5-diaminohexanoate dehydrogenase | 0.02 | -    |
| Q1DD72        | peptidase                                    | 0.02 | -    |
| Q1D4R7        | peptidase                                    | 0.07 | -    |
| Q1D6K7        | chorismate synthase                          | 0.15 | -    |
| Q1CY62        | protease                                     | 0.04 | -    |
| <b>Q1D3A8</b> | L-lysine 2,3-aminomutase                     | 0.04 | -    |
| Q1CW90        | metallopeptidase                             | 0.04 | -    |
| Q1CY13        | peptidase                                    | 0.03 | 0.09 |
| Q1CYP7        | serine protease                              | 0.02 | -    |
| Q1DCI3        | gamma-glutamyltranspeptidase                 | 0.05 | -    |
| <b>Q1DBP3</b> | deoxyhypusine synthase family protein        | 0.03 | -    |
| Q1DDS8        | protease                                     | 0.03 | -    |
| Q1D013        | glutamate dehydrogenase                      | 0.03 | -    |
| A0A0H4W       |                                              |      |      |
| WS1           | sarcosine oxidase                            | 0.02 | -    |
| Q1DA16        | peptidyl-dipeptidase                         | 0.03 | -    |
| <b>Q1D3D3</b> | dihydrodipicolinate reductase                | 0.05 | -    |
| <b>DAPB</b>   | 4-hydroxy-tetrahydrodipicolinate reductase   | 0.04 | -    |
| <b>Q1DDD9</b> | Glu/Leu/Phe/Val dehydrogenase                | 0.02 | -    |
| <b>Q1D1D4</b> | peptidase                                    | 0.03 | 0.10 |
| <b>Q1DCD4</b> | L-allo-threonine aldolase                    | 0.02 | -    |
| <b>HGD</b>    | homogentisate 1,2-dioxygenase                | -    | 0.13 |
| <b>Q1D188</b> | peptidase                                    | -    | 0.04 |
| Q1D6G9        | peptidase                                    | -    | 0.09 |

|                                                    |                                             |      |      |
|----------------------------------------------------|---------------------------------------------|------|------|
| Q1D7W5                                             | aspartate-semialdehyde dehydrogenase        | -    | 0.03 |
| <b>Q1CYR4</b>                                      | serine protease                             | -    | 0.06 |
| <b>Q1DFN6</b>                                      | aminotransferase                            | -    | 0.03 |
| Q1D8P6                                             | peptidase                                   | -    | 0.03 |
| Q1DE55                                             | peptidase                                   | -    | 0.02 |
| Q1CZR8                                             | peptidase                                   | -    | 0.04 |
| Q1D8L5                                             | protease                                    | -    | 0.07 |
| <b>PAND</b>                                        | aspartate 1-decarboxylase                   | -    | 0.08 |
| <b>SERC</b>                                        | phosphoserine aminotransferase              | -    | 0.11 |
| Q1DEW6                                             | peptidase                                   |      |      |
| <b>Carbohydrate metabolism</b>                     |                                             |      |      |
| <b>Q1DCV2</b>                                      | phosphoenolpyruvate carboxykinase           | 0.22 | -    |
| <b>Q1D5Z8</b>                                      | fructose-bisphosphate aldolase              | 0.34 | 0.06 |
| <b>Q1D8J1</b>                                      | glyceraldehyde-3-phosphate dehydrogenase    | 0.28 | 0.43 |
| <b>Q1CVV7</b>                                      | transketolase                               | 0.13 | -    |
| ENO                                                | enolase                                     | 0.23 | 0.05 |
| TAL                                                | transaldolase                               | 0.29 | -    |
| <b>Q1DDQ9</b>                                      | glucose-6-phosphate 1-dehydrogenase         | 0.17 | -    |
| <b>TPIS</b>                                        | triosephosphate isomerase                   | 0.26 | 0.09 |
| Q1CY18                                             | gluconolactonase                            | 0.12 | 0.11 |
| <b>Q1D1J6</b>                                      | GDP-mannose 4,6-dehydratase                 | 0.11 | -    |
| Q1DDR1                                             | 6-phosphogluconate dehydrogenase            | 0.10 | -    |
| <b>G6PI</b>                                        | glucose-6-phosphate isomerase               | 0.09 | 0.16 |
| <b>Q1D0G8</b>                                      | phosphoglucomutase/phosphomannomutase       | 0.04 | -    |
| Q1CXL1                                             | glucose/sorbosone dehydrogenase             | 0.08 | 0.04 |
| <b>Q1D6M2</b>                                      | UDP-glucose 4-epimerase                     | 0.07 | -    |
| <b>Q1D8J0</b>                                      | phosphoglycerate kinase                     | 0.06 | -    |
| <b>Q1D6L5</b>                                      | pyruvate kinase                             | 0.05 | -    |
| <b>Q1CYU9</b>                                      | pyruvate kinase                             | 0.03 | -    |
| <b>Q1DCE1</b>                                      | UTP-glucose-1-phosphate uridylyltransferase | 0.05 | -    |
| Q1D3S1                                             | chitinase                                   | 0.05 | -    |
| <b>Q1DDR0</b>                                      | 6-phosphogluconolactonase                   | 0.04 | -    |
| <b>GLGA</b>                                        | glycogen synthase                           | 0.02 | -    |
| <b>Cell wall, membrane and envelope biogenesis</b> |                                             |      |      |
| Q1DDQ0                                             | lipoprotein                                 | 0.17 | 0.17 |
| Q1CVX7                                             | lipoprotein                                 | 0.23 | 0.03 |
| Q1CZE8                                             | outer membrane protein                      | 0.23 | 0.13 |
| MLPA                                               | lipoprotein MlpA                            | 0.20 | 0.20 |
| Q1D8U6                                             | lipoprotein                                 | 0.15 | 0.14 |
| Q1D0K1                                             | lipoprotein                                 | 0.50 | 0.28 |
| Q1DD51                                             | lipoprotein                                 | 0.10 | -    |
| Q1D8L4                                             | lipoprotein                                 | 0.26 | 0.17 |
| Q1CXU8                                             | lipoprotein                                 | 0.12 | 0.08 |
| <b>Q1CYZ9</b>                                      | Kelch motif/HYR domain protein              | 0.09 | 0.06 |
| Q1CWA7                                             | outer membrane protein                      | 0.26 | -    |
| Q1DFL0                                             | cell surface protein                        | 0.23 | 0.20 |

|               |                                         |      |      |
|---------------|-----------------------------------------|------|------|
| Q1CZ46        | secretion system protein                | 0.32 | -    |
| <b>Q1CY27</b> | cell surface protein                    | 0.08 | 0.06 |
| Q1CY79        | lipoprotein                             | 0.32 | -    |
| Q1D364        | outer membrane lipoprotein              | 0.12 | 0.08 |
| Q1D6V9        | lipoprotein                             | 0.18 | 0.04 |
| Q1CXU6        | lipoprotein                             | 0.14 | 0.10 |
| Q1D9N0        | cell surface protein lipoprotein        | 0.18 | 0.08 |
| Q1CWM1        | lipoprotein                             | 0.18 | -    |
| Q1D0H4        | lipoprotein                             | 0.17 | -    |
| Q1DCM4        | lipoprotein                             | 0.11 | 0.11 |
| Q1DE07        | chemotaxis protein MotB                 | 0.22 | -    |
| Q1D8J2        | N-acetylmuramoyl-L-alanine amidase      | 0.05 | 0.02 |
| <b>Q1CY59</b> | stomatin-like domain-containing protein | 0.14 | -    |
| <b>Q1D5A9</b> | stomatin-like domain-containing protein | 0.16 | -    |
| Q1D813        | LysM domain protein                     | 0.12 | -    |
| Q1D9B4        | outer membrane protein                  | 0.13 | 0.05 |
| <b>Q1CWS3</b> | chemotaxis protein MotB                 | 0.16 | -    |
| Q1CWB1        | lipoprotein                             | 0.03 | 0.03 |
| Q1D1K7        | outer membrane protein                  | 0.15 | -    |
| Q1D3C1        | outer membrane protein                  | 0.13 | 0.07 |
| Q1DDE9        | lipoprotein                             | 0.12 | -    |
| Q1CXN6        | lipoprotein                             | 0.18 | 0.18 |
| Q1D049        | Ig-like domain protein                  | 0.02 | 0.01 |
| <b>Q1D805</b> | membrane protein                        | 0.05 | -    |
| Q1CVX8        | lipoprotein                             | 0.13 | -    |
| Q1DEJ6        | lipoprotein                             | 0.05 | 0.02 |
| Q1D227        | Tol-pal system protein YbgF             | 0.11 | -    |
| <b>Q1D729</b> | L-seryl-tRNA(Sec) selenium transferase  | 0.07 | -    |
| Q1DC33        | lipoprotein                             | 0.13 | -    |
| Q1D638        | lipoprotein                             | 0.11 | -    |
| Q1D917        | outer membrane protein                  | 0.13 | 0.11 |
| Q1D3F5        | pilus assembly protein                  | 0.14 | -    |
| Q1D122        | lipoprotein                             | 0.18 | 0.16 |
| Q1DE38        | lipoprotein                             | 0.06 | -    |
| Q1D139        | outer membrane protein                  | 0.09 | 0.07 |
| Q1DDT8        | outer membrane protein                  | 0.09 | 0.11 |
| Q1CYN2        | lipoprotein                             | 0.13 | 0.08 |
| Q1DDJ2        | type IV pilus assembly protein          | 0.02 | -    |
| Q1DA87        | lipoprotein                             | 0.05 | -    |
| Q1DCK1        | pilus assembly protein                  | 0.02 | 0.01 |
| Q1D0G9        | outer membrane protein                  | 0.06 | -    |
| Q1DAK4        | OmpA domain protein                     | 0.03 | -    |
| <b>Q306N4</b> | type IV secretion protein PilO          | 0.07 | -    |
| Q1DFQ7        | lipoprotein                             | 0.16 | -    |
| Q1D1X6        | OmpA domain protein                     | 0.05 | -    |
| Q1D218        | OmpA family protein                     | 0.12 | -    |



|                                         |                                           |      |      |
|-----------------------------------------|-------------------------------------------|------|------|
| Q1D811                                  | MotA/TolQ/ExbB proton channel protein     | 0.05 | -    |
| <b>Q1D383</b>                           | BamA                                      | 0.02 | -    |
| <b>Q1D0S5</b>                           | UDP-N-acetylmuramyl-tripeptide synthetase | 0.05 | -    |
| <b>Q1DD080</b>                          | pilus assembly protein PilM               | 0.04 | -    |
| Q1D427                                  | outer membrane protein                    | 0.09 | -    |
| Q1CYZ8                                  | OmpA domain protein                       | 0.04 | -    |
| Q1D314                                  | surface cell protein                      | 0.01 | 0.02 |
| Q1D991                                  | lipoprotein                               | 0.03 | -    |
| <b>Q1D2C6</b>                           | OmpA domain protein                       | 0.03 | 0.10 |
| Q1D1M7                                  | collagen triple helix repeat protein      | 0.05 | 0.09 |
| Q1CWC6                                  | lipoprotein                               | 0.06 | 0.04 |
| Q1D3M7                                  | membrane protein                          | 0.07 | -    |
| Q1D1J2                                  | lipoprotein                               | 0.08 | -    |
| Q1D8L3                                  | lipoprotein                               | 0.04 | 0.04 |
| Q1DAX3                                  | lipoprotein                               | 0.05 | -    |
| <b>Q1DAE0</b>                           | lipoprotein                               | 0.01 | 0.02 |
| Q1D6F4                                  | lipoprotein                               | 0.05 | -    |
| <b>Q1DE67</b>                           | lipoprotein                               | 0.02 | 0.03 |
| Q1D0I5                                  | lipoprotein                               | 0.02 | -    |
| Q1D191                                  | cell surface protein                      | -    | 0.21 |
| Q1CVK5                                  | Ig domain protein                         | -    | 0.04 |
| Q1D8Z4                                  | outer membrane lipoprotein                | -    | 0.06 |
| Q1D0T6                                  | OmpA domain protein                       | -    | 0.01 |
| Q1D9T7                                  | lipoprotein                               | -    | 0.04 |
| Q1DE25                                  | lipoprotein                               | -    | 0.07 |
| Q1D271                                  | Ig domain protein                         | -    | 0.02 |
| Q1D7R7                                  | lipoprotein                               | -    | 0.01 |
| Q1D646                                  | lipoprotein                               | -    | 0.03 |
| Q1D7R8                                  | lipoprotein                               | -    | 0.02 |
| <b>Q1D303</b>                           | type IV secretion system protein          | -    | 0.06 |
| Q1CXP7                                  | lipoprotein                               | -    | 0.02 |
| <b>Q1CXB9</b>                           | lipoprotein                               | -    | 0.07 |
| A0A0H4W                                 |                                           | -    |      |
| XC7                                     | outer membrane protein assembly factor    |      | 0.02 |
| Q1D9P7                                  | Omp A domain protein                      | -    | 0.06 |
| <b>Energy production and conversion</b> |                                           |      |      |
| <b>ATPB</b>                             | ATP synthase                              | 0.43 | 0.11 |
| <b>Q1D4M9</b>                           | dihydrolipoyl dehydrogenase               | 0.38 | 0.09 |
| <b>Q1CZF9</b>                           | molybdopterin oxidoreductase              | 0.20 | 0.07 |
| <b>ATPA</b>                             | ATP synthase                              | 0.38 | 0.11 |
| <b>Q1D6L0</b>                           | citrate synthase                          | 0.27 | 0.14 |
| <b>Q1D8Y7</b>                           | pyruvate dehydrogenase                    | 0.34 | 0.04 |
| <b>Q1D8Y8</b>                           | pyruvate dehydrogenase                    | 0.26 | -    |
| MDH                                     | malate dehydrogenase                      | 0.32 | 0.09 |
| Q1D6J1                                  | succinate dehydrogenase                   | 0.22 | 0.04 |
| Q1DCK3                                  | aconitate hydratase                       | 0.14 | 0.02 |

|                                         |                                                    |      |      |
|-----------------------------------------|----------------------------------------------------|------|------|
| <b>Q1CYR1</b>                           | isocitrate dehydrogenase                           | 0.31 | 0.08 |
| <b>Q1CZK3</b>                           | 2-oxoglutarate dehydrogenase                       | 0.10 | 0.01 |
| <b>Q846U1</b>                           | adventurous gliding motility protein               | 0.21 | -    |
| <b>SUCC</b>                             | succinyl-CoA ligase                                | 0.29 | -    |
| <b>Q1D8Y6</b>                           | pyruvate dehydrogenase                             | 0.16 | -    |
| <b>Q1D4N1</b>                           | alpha keto acid dehydrogenase                      | 0.26 | -    |
| <b>ATPG</b>                             | ATP synthase                                       | 0.26 | -    |
| <b>Q1D1C4</b>                           | cytochrome c                                       | 0.12 | 0.07 |
| <b>Q1CZK2</b>                           | 2-oxoglutarate dehydrogenase                       | 0.15 | -    |
| <b>Q1CZX3</b>                           | pyruvate dehydrogenase                             | 0.14 | -    |
| <b>Q1D4Q0</b>                           | CyaE                                               | 0.12 | -    |
| <b>Q1CZF6</b>                           | cytochrome c family protein                        | 0.20 | -    |
| <b>Q1D6I8</b>                           | succinyl-CoA ligase                                | 0.18 | -    |
| <b>Q1D6J0</b>                           | succinate dehydrogenase                            | 0.16 | -    |
| <b>ATPD</b>                             | ATP synthase                                       | 0.25 | -    |
| <b>NUOD</b>                             | NADH-quinone oxidoreductase                        | 0.10 | -    |
| <b>Q1D2C8</b>                           | aldehyde dehydrogenase                             | 0.06 | -    |
| <b>Q1D856</b>                           | NADH-quinone oxidoreductase                        | 0.16 | -    |
| <b>NUOI</b>                             | NADH-quinone oxidoreductase                        | 0.12 | -    |
| <b>Q1D8S8</b>                           | NADH dehydrogenase I                               | 0.06 | -    |
| <b>Q1CWX3</b>                           | aldehyde dehydrogenase                             | 0.04 | -    |
| <b>Q1DA35</b>                           | 2-nitropropane dioxygenase                         | 0.07 | 0.12 |
| <b>NUOB</b>                             | NADH-quinone oxidoreductase                        | 0.05 | -    |
| <b>Q1CZG0</b>                           | cytochrome c                                       | 0.12 | -    |
| <b>Q1DDC7</b>                           | NADH dehydrogenase                                 | 0.14 | -    |
| <b>Q1D5X3</b>                           | PQQ enzyme repeat domain protein                   | 0.07 | -    |
| <b>Q1CW00</b>                           | short chain dehydrogenase                          | 0.05 | -    |
| <b>Q1DDC8</b>                           | NADH dehydrogenase                                 | 0.05 | -    |
| <b>ATPF</b>                             | ATP synthase                                       | 0.12 | -    |
| <b>Q1DDE1</b>                           | succinate dehydrogenase                            | 0.06 | -    |
| <b>Q1CZF2</b>                           | cytochrome c                                       | 0.03 | -    |
| <b>Q1D6Y7</b>                           | oxidoreductase                                     | -    | 0.04 |
| <b>Lipid metabolism and ketogenesis</b> |                                                    |      |      |
| <b>Q1CWS1</b>                           | lipase                                             | 0.31 | 0.21 |
| <b>Q1D4F3</b>                           | patatin-like phospholipase                         | 0.35 | 0.13 |
| <b>Q1CYB4</b>                           | acetyl co-enzyme A carboxylase carboxyltransferase | 0.37 | 0.16 |
| <b>Q1D030</b>                           | acetyl-coenzyme A synthetase                       | 0.19 | 0.06 |
| <b>Q1D5V0</b>                           | acetyl-CoA acetyltransferase                       | 0.33 | 0.10 |
| <b>Q1D9B8</b>                           | long-chain-fatty-acid--CoA ligase                  | 0.20 | -    |
| <b>Q1D233</b>                           | 3-hydroxyacyl-CoA dehydrogenase                    | 0.17 | -    |
| <b>Q1D5Y2</b>                           | carboxyl transferase domain protein                | 0.19 | -    |
| <b>Q1D009</b>                           | YceI-like family protein                           | 0.27 | 0.14 |
| <b>Q1D3D6</b>                           | acyl-CoA dehydrogenase                             | 0.13 | 0.12 |
| <b>BKT</b>                              | beta-ketothiolase                                  | 0.17 | -    |
| <b>Q1D5U4</b>                           | acyl-CoA dehydrogenase                             | 0.10 | -    |
| <b>Q1D984</b>                           | acetyl-coenzyme A synthetase                       | 0.06 | -    |

|                                                               |                                                        |      |      |
|---------------------------------------------------------------|--------------------------------------------------------|------|------|
| <b>Q1DDA0</b>                                                 | propionyl-CoA carboxylase                              | 0.07 | 0.02 |
| <b>Q1DFT0</b>                                                 | 3-oxoacyl-[acyl-carrier protein] reductase             | 0.21 | -    |
| <b>Q1D0B9</b>                                                 | acetyl-CoA carboxylase. biotin carboxylase             | 0.10 | -    |
| <b>Q1D340</b>                                                 | malonyl CoA-acyl carrier protein transacylase          | 0.11 | -    |
| <b>Q1D5U1</b>                                                 | 3-hydroxyacyl-CoA dehydrogenase                        | 0.18 | -    |
| <b>Q1D5U2</b>                                                 | enoyl CoA hydratase                                    | 0.13 | -    |
| <b>Q1D4E4</b>                                                 | acyl-CoA dehydrogenase                                 | 0.07 | -    |
| <b>Q1D0T9</b>                                                 | acetyl CoA carboxylase                                 | 0.03 | -    |
| <b>Q1D555</b>                                                 | acetyl-coenzyme A carboxylase carboxyl transferase     | 0.06 | -    |
| <b>Q1D234</b>                                                 | acetyl-CoA acetyltransferase                           | 0.05 | -    |
| <b>Q1CZK4</b>                                                 | enoyl-[acyl-carrier-protein]                           | 0.07 | -    |
| <b>Q1DDA2</b>                                                 | propionyl-CoA carboxylase                              | 0.04 | -    |
| <b>Q1D343</b>                                                 | 3-oxoacyl-[acyl-carrier-protein] synthase              | 0.07 | -    |
| <b>Q1D964</b>                                                 | acyl-CoA hydrolase                                     | 0.08 | -    |
| <b>Q1CYM5</b>                                                 | medium-chain fatty acid-CoA ligase                     | 0.03 | -    |
| <b>A0A0H4W</b>                                                |                                                        |      |      |
| <b>WQ8</b>                                                    | acyl-CoA dehydrogenase                                 | 0.02 | -    |
| <b>Q1D5Y4</b>                                                 | 3-hydroxybutyryl-CoA hydratase                         | 0.05 | -    |
| <b>Q1D8V2</b>                                                 | acetyl-coenzyme A carboxylase carboxyl transferase     | 0.05 | -    |
| <b>Q1D5Y1</b>                                                 | acyl-CoA dehydrogenase                                 | 0.04 | -    |
| <b>Q1D5W1</b>                                                 | patatin-like phospholipase family protein              | 0.01 | -    |
| <b>Q1D5V2</b>                                                 | 3-oxoacid CoA-transferase family                       | 0.07 | -    |
| <b>Q1D855</b>                                                 | long-chain-fatty-acid--CoA ligase                      | 0.02 | -    |
| <b>Q1D566</b>                                                 | acyltransferase                                        | 0.02 | -    |
| <b>Q1CZW5</b>                                                 | acyl-CoA dehydrogenase                                 | 0.02 | 0.02 |
| <b>Q1D003</b>                                                 | beta-ketothiolase                                      | -    | 0.13 |
| <b>Replication, transcription, translation and DNA repair</b> |                                                        |      |      |
| <b>EFTU1</b>                                                  | elongation factor Tu                                   | 0.62 | -    |
| <b>RPOB</b>                                                   | DNA-directed RNA polymerase                            | 0.14 | -    |
| <b>Q1CYZ6</b>                                                 | cyclic nucleotide-binding domain protein               | 0.26 | -    |
| <b>Q1DAM8</b>                                                 | transcription termination/antitermination protein NusA | 0.27 | -    |
| <b>RPOC</b>                                                   | DNA-directed RNA polymerase                            | 0.10 | -    |
| <b>RPOA</b>                                                   | DNA-directed RNA polymerase                            | 0.22 | -    |
| <b>Q1DC39</b>                                                 | DNA topoisomerase                                      | 0.36 | -    |
| <b>Q1CYZ5</b>                                                 | cyclic nucleotide-binding domain protein               | 0.15 | -    |
| <b>Q1D015</b>                                                 | ATP-dependent helicase                                 | 0.10 | -    |
| <b>AGLZ</b>                                                   | adventurous-gliding motility protein                   | 0.06 | -    |
| <b>TPS</b>                                                    | development-specific protein                           | 0.21 | -    |
| <b>EFTS</b>                                                   | elongation factor                                      | 0.25 | -    |
| <b>Q1D9U0</b>                                                 | glutamine--tRNA ligase                                 | 0.12 | -    |
| <b>Q1D8J8</b>                                                 | OB-fold nucleic acid binding domain protein            | 0.11 | -    |
| <b>Q1DDC0</b>                                                 | response regulator receiver domain protein (CheY-like) | 0.11 | -    |
| <b>SYP</b>                                                    | proline--tRNA ligase                                   | 0.10 | -    |
| <b>L7UF14</b>                                                 | ribonuclease                                           | 0.03 | -    |
| <b>SYM</b>                                                    | methionine--tRNA ligase                                | 0.06 | -    |
| <b>SYT</b>                                                    | threonine--tRNA ligase                                 | 0.07 | -    |

|                                      |                                      |      |      |
|--------------------------------------|--------------------------------------|------|------|
| <b>Q1CWL9</b>                        | 5'-nucleotidase                      | 0.06 | -    |
| <b>Q1D5U8</b>                        | SSU ribosomal protein S1p            | 0.07 | -    |
| <b>IF2</b>                           | translation initiation factor IF-2   | 0.04 | -    |
| <b>Q1D1Z2</b>                        | exodeoxyribonuclease III             | 0.10 | -    |
| <b>RS2</b>                           | 30S ribosomal protein                | 0.12 | -    |
| <b>Q1D0I2</b>                        | PspA/IM30 family protein             | 0.14 | -    |
| <b>EFG1</b>                          | elongation factor G 1                | 0.04 | -    |
| <b>Q1DCG4</b>                        | transcriptional regulator            | 0.08 | -    |
| <b>Q1DEC3</b>                        | signal transduction protein          | 0.04 | -    |
| <b>Q1DFW6</b>                        | methyl-accepting chemotaxis protein  | 0.06 | -    |
| <b>SYS</b>                           | serine--tRNA ligase                  | 0.02 | -    |
| <b>Q1D7Q3</b>                        | DNA-binding protein FruA             | 0.12 | -    |
| <b>Q1CZ22</b>                        | isoleucine--tRNA ligase              | 0.03 | -    |
| <b>SYA</b>                           | alanine--tRNA ligase                 | 0.04 | -    |
| <b>RL9</b>                           | 50S ribosomal protein L9             | 0.13 | -    |
| <b>SYN</b>                           | asparagine--tRNA ligase              | 0.05 | -    |
| <b>TIG</b>                           | trigger factor                       | 0.05 | -    |
| <b>Q1D293</b>                        | 50S ribosomal protein L25            | 0.13 | -    |
| <b>Q1D5D5</b>                        | tRNA pseudouridine synthase          | 0.03 | -    |
| <b>SYGB</b>                          | glycine--tRNA ligase                 | 0.03 | -    |
| <b>IF3</b>                           | translation initiation factor IF-3   | 0.07 | -    |
| <b>Q1D1I5</b>                        | phosphohistidine phosphatase SixA    | 0.14 | -    |
| <b>Q1D7R1</b>                        | DNA polymerase I                     | 0.02 | -    |
| <b>RL10</b>                          | 50S ribosomal protein L10            | 0.08 | -    |
| <b>Q1DGB6</b>                        | exoribonuclease                      | 0.04 | -    |
| <b>RRF</b>                           | ribosome-recycling factor            | 0.10 | -    |
| <b>Q1D4V8</b>                        | gliding motility regulatory protein  | 0.02 | -    |
| <b>Q1DFR3</b>                        | transcriptional regulator            | 0.19 | -    |
| <b>Q1D3Z2</b>                        | valine--tRNA ligase                  | 0.01 | -    |
| <b>Q1D5P9</b>                        | tryptophanyl-tRNA synthetase         | 0.05 | -    |
| <b>Q1D3Z1</b>                        | response regulator                   | 0.04 | -    |
| <b>Q1D3C3</b>                        | aspartyl-tRNA synthetase             | 0.01 | -    |
| <b>RL2</b>                           | 50S ribosomal protein L2             | 0.05 | -    |
| <b>Q1DEC4</b>                        | histidine kinase/response regulator  | 0.01 | -    |
| <b>Q1DAU4</b>                        | 30S ribosomal protein S9             | 0.10 | -    |
| <b>Q1D3G7</b>                        | histidine kinase/response regulator  | 0.02 | -    |
| <b>Q1D8Z3</b>                        | 5'-nucleotidase family protein       | 0.02 | 0.02 |
| <b>Q1D668</b>                        | methyl accepting chemotaxis protein  | 0.03 | -    |
| <b>Q1D087</b>                        | translation elongation factor        | 0.05 | -    |
| <b>Q1D0P8</b>                        | transcription termination factor Rho | 0.02 | -    |
| <b>EFTU2</b>                         | elongation factor Tu 2               | -    | 0.23 |
| <b>Q1DDE2</b>                        | single-stranded DNA-binding protein  | -    | 0.11 |
| <b>Stress and defense mechanisms</b> |                                      |      |      |
| <b>CH602</b>                         | chaperonin                           | 0.49 | 0.11 |
| <b>Q1D7G6</b>                        | DSBA-like thioredoxin domain protein | 0.47 | 0.16 |
| <b>CH601</b>                         | chaperonin                           | 0.47 | 0.19 |

|                                        |                                              |      |      |
|----------------------------------------|----------------------------------------------|------|------|
| <b>Q1DC07</b>                          | alkyl hydroperoxide reductase                | 0.62 | 0.14 |
| Q1D2K1                                 | thioredoxin domain-containing protein        | 0.41 | 0.08 |
| <b>Q1D7I0</b>                          | chaperone protein DnaK                       | 0.21 | 0.03 |
| <b>Q1D6H4</b>                          | encapsulating protein for peroxidase         | 0.23 | 0.20 |
| Q1D2Y6                                 | superoxide dismutase                         | 0.23 | 0.16 |
| Q1D024                                 | superoxide dismutase                         | 0.20 | -    |
| <b>Q1D5A0</b>                          | Lon protease                                 | 0.05 | -    |
| <b>B8QZT3</b>                          | chaperone HtpG                               | 0.03 | -    |
| F8CP79                                 | DSBA-like thioredoxin                        | 0.03 | -    |
| <b>A0A0F7E2</b>                        |                                              |      |      |
| <b>A3</b>                              | chaperonin                                   | 0.18 | -    |
| <b>Q1D2Z9</b>                          | chaperone ClpB                               | 0.02 | -    |
| <b>Q1D902</b>                          | thioredoxin                                  | 0.25 | 0.13 |
| <b>Q1D0R6</b>                          | chaperone                                    | 0.09 | -    |
| <b>Q1DC09</b>                          | Dps family protein                           | 0.11 | -    |
| <b>Q1CWM0</b>                          | glutathione peroxidase                       | 0.10 | -    |
| <b>Q1D1X3</b>                          | thioredoxin domain-containing protein        | 0.04 | -    |
| <b>Q1CWQ0</b>                          | peptide methionine sulfoxide reductase       | 0.06 | -    |
| <b>Q1D8R6</b>                          | OsmC/Ohr family protein                      | 0.07 | -    |
| Q1D819                                 | HtrA protease/chaperone protein              | 0.02 | -    |
| <b>Q1CWL7</b>                          | S-formylglutathione hydrolase                | -    | 0.10 |
| <b>Transport, secretion and efflux</b> |                                              |      |      |
| Q1DCB6                                 | TonB-dependent receptor                      | 0.40 | 0.27 |
| <b>Q1CX48</b>                          | TonB-dependent receptor                      | 0.45 | -    |
| Q1CWS0                                 | long fatty acid chain transporter            | 0.35 | 0.20 |
| Q1D031                                 | porin                                        | 0.24 | 0.14 |
| <b>Q1D365</b>                          | TonB-dependent receptor                      | 0.22 | 0.18 |
| Q1DBN3                                 | TonB family protein                          | 0.18 | -    |
| Q1D2E5                                 | TonB dependent receptor                      | 0.23 | 0.05 |
| Q1D9E0                                 | secretion pathway protein                    | 0.18 | 0.04 |
| Q1D2D8                                 | efflux transporter                           | 0.30 | 0.27 |
| <b>Q1D304</b>                          | type V1 secretion protein                    | 0.22 | 0.08 |
| Q1DCQ0                                 | TonB dependent receptor                      | 0.16 | -    |
| <b>Q1CYB8</b>                          | MotA/TolQ/ExbB proton channel family protein | 0.22 | 0.16 |
| Q1DCG9                                 | PBS lyase HEAT-like repeat protein           | 0.13 | -    |
| Q1D4S2                                 | outer membrane efflux protein                | 0.17 | 0.13 |
| <b>Q1CX94</b>                          | MotA/TolQ/ExbB proton channel protein        | 0.23 | 0.12 |
| Q1DE39                                 | TonB family protein                          | 0.10 | 0.03 |
| Q1CVN2                                 | efflux protein                               | 0.18 | 0.05 |
| <b>Q1DCB8</b>                          | MotA/TolQ/ExbB proton channel protein        | 0.21 | -    |
| <b>A176_0055</b>                       |                                              |      |      |
| <b>31</b>                              | Oar protein                                  | 0.01 | -    |
| Q1CXU1                                 | branched chain amino acid ABC transporter    | 0.19 | 0.21 |
| Q1DDZ2                                 | apolipoprotein-containing domain             | 0.10 | -    |
| Q1D4F4                                 | arsenical pump-driving ATPase                | 0.13 | -    |
| <b>Q1D697</b>                          | iron-chelator utilization protein            | 0.17 | 0.13 |

|                        |                                                            |      |      |
|------------------------|------------------------------------------------------------|------|------|
| Q1DB13                 | porin                                                      | 0.11 | 0.08 |
| Q1D3P6                 | TonB dependent receptor                                    | 0.05 | -    |
| Q1CVZ3                 | porin                                                      | 0.12 | 0.10 |
| Q1DEY6                 | TonB-dependent receptor                                    | 0.05 | 0.02 |
| <b>SECA</b>            | translocase SecA                                           | 0.04 | -    |
| Q1D9H3                 | signal peptide peptidase SppA                              | 0.06 | -    |
| <b>Q1DFV8</b>          | efflux pump                                                | 0.05 | -    |
| Q1DEU2                 | phosphate-selective porin                                  | 0.08 | -    |
| Q1DCV4                 | ABC transporter                                            | 0.08 | 0.08 |
| Q1DE87                 | iron ABC transporter                                       | 0.09 | -    |
| <b>Q1DEU5</b>          | ABC transporter                                            | 0.04 | -    |
| Q1D5I8                 | efflux transporter                                         | 0.08 | 0.02 |
| <b>Q1D099</b>          | twitching motility protein                                 | 0.09 | -    |
| <b>Q1D2U8</b>          | TonB domain protein                                        | 0.05 | -    |
| <b>Q1DD62</b>          | amino acid transporter                                     | 0.07 | 0.04 |
| Q1DFZ8                 | WD domain G-beta repeat/PBS lyase HEAT-like repeat protein | 0.01 | -    |
| <b>Q1DEV0</b>          | ABC transporter                                            | 0.03 | -    |
| Q1CWK2                 | cysteine-rich secretory protein                            | 0.14 | -    |
| TOLB                   | TolB                                                       | 0.07 | -    |
| Q1DEG8                 | ferric siderophore ABC transporter                         | 0.06 | -    |
| <b>Q1D696</b>          | siderophore biosynthesis aminotransferase                  | 0.05 | 0.03 |
| Q1DCP7                 | hemin ABC transporter                                      | 0.05 | -    |
| <b>Q1DCC0</b>          | ExbD/TolR transport protein                                | 0.11 | -    |
| Q1D7R4                 | protein transporter                                        | 0.04 | -    |
| Q1CZ64                 | efflux transporter                                         | 0.05 | -    |
| <b>Q1CYB7</b>          | transport energizing protein                               | 0.17 | -    |
| <b>Q1D3B5</b>          | preprotein translocase YajC                                | 0.17 | -    |
| Q1D521                 | ABC transporter                                            | 0.05 | -    |
| Q1DCB7                 | TonB                                                       | 0.08 | -    |
| Q1D8I1                 | Nit/TauT transport system                                  | 0.05 | -    |
| Q1CVG1                 | insertase YidC                                             | 0.02 | -    |
| <b>Q1D3Z8</b>          | polyketide cyclase/dehydrase and lipid transport           | 0.09 | -    |
| Q1CY23                 | TonB-dependent receptor                                    | 0.02 | -    |
| Q1D5Z6                 | phospholipid transport system                              | 0.07 | -    |
| Q1D1X8                 | PBS lyase HEAT repeat-like domain protein                  | 0.03 | -    |
| A0A0H4W                |                                                            |      |      |
| T21                    | arsenical pump-driving ATPase                              | 0.01 | -    |
| <b>Q1D9M3</b>          | ABC transporter                                            | 0.04 | -    |
| Q1CVX9                 | TonB-dependent receptor                                    | 0.01 | -    |
| <b>Q1D0D3</b>          | MotA/TolQ/ExbB proton channel protein                      | 0.04 | -    |
| <b>Other functions</b> |                                                            |      |      |
| Q1CWK0                 | peptidyl-prolyl cis-trans isomerase                        | 0.52 | 0.31 |
| Q1D9I3                 | 5'-nucleotidase family protein                             | 0.31 | 0.12 |
| Q1D3W0                 | phage tail sheath protein                                  | 0.20 | 0.30 |
| Q1DF51                 | myo-inositol-1-phosphate synthase                          | 0.28 | -    |

|               |                                                                 |      |      |
|---------------|-----------------------------------------------------------------|------|------|
| <b>Q1DCH7</b> | alkaline phosphatase                                            | 0.17 | 0.14 |
| <b>Q1D0E3</b> | aspartyl beta-hydroxylase                                       | 0.22 | 0.08 |
| <b>Q1DEX1</b> | NAD dependent epimerase/dehydratase                             | 0.18 | -    |
| <b>Q1CVJ5</b> | bactofilin                                                      | 0.63 | -    |
| <b>NDK</b>    | nucleoside diphosphate kinase                                   | 0.66 | -    |
| <b>Q1D4V7</b> | frizzy aggregation protein                                      | 0.24 | 0.07 |
| <b>Q1DD37</b> | peptidyl-prolyl cis-trans isomerase                             | 0.23 | -    |
| <b>Q1D4E5</b> | phosphodiesterase/nucleotide pyrophosphatase family protein     | 0.19 | -    |
| <b>Q1DCD9</b> | glutathione S-transferase                                       | 0.28 | 0.09 |
| <b>Q1DC52</b> | adenosine deaminase                                             | 0.19 | -    |
| <b>GLPK</b>   | glycerol kinase                                                 | 0.17 | -    |
| <b>Q1D458</b> | feruloyl esterase                                               | 0.15 | 0.19 |
| <b>Q1D5W4</b> | iInosine-5'-monophosphate dehydrogenase                         | 0.11 | 0.05 |
| <b>CGLB</b>   | CglB                                                            | 0.11 | 0.05 |
| <b>PURA</b>   | adenylosuccinate synthetase                                     | 0.12 | -    |
| <b>Q1DA41</b> | B12 binding domain/ArgK/methylmalonyl-CoA mutase family protein | 0.05 | -    |
| <b>Q1D440</b> | methyl transferase                                              | 0.09 | -    |
| <b>Q1CVR5</b> | vegetative protein                                              | 0.21 | -    |
| <b>Q1D1J7</b> | phytase                                                         | 0.11 | -    |
| <b>Y1394</b>  | beta lactamase                                                  | 0.14 | -    |
| <b>Q1CYB9</b> | oxidoreductase                                                  | 0.14 | -    |
| <b>Q1D6F6</b> | metallophosphoesterase                                          | 0.12 | 0.03 |
| <b>Q1DDZ8</b> | glutathione S-transferase                                       | 0.22 | -    |
| <b>Q1D5X7</b> | peptidyl-prolyl cis-trans isomerase                             | 0.19 | -    |
| <b>Q1DFJ0</b> | oxidoreductase                                                  | 0.14 | -    |
| <b>Q1D7G7</b> | dihydrofolate reductase                                         | 0.21 | 0.29 |
| <b>Q1D3H2</b> | bactofilin                                                      | 0.16 | 0.06 |
| <b>Q1DG65</b> | amidohydrolase                                                  | 0.01 | -    |
| <b>Q1D4E8</b> | polyketide synthase                                             | 0.02 | -    |
| <b>L7U7N0</b> | serine-threonine protein kinase                                 | 0.05 | -    |
| <b>PYRF</b>   | orotidine 5'-phosphate decarboxylase                            | 0.10 | -    |
| <b>Q1CWR7</b> | oxidoreductase                                                  | 0.07 | -    |
| <b>Q1DCF0</b> | NAD-dependent epimerase/dehydratase                             | 0.13 | -    |
| <b>PYRG</b>   | CTP synthase                                                    | 0.05 | -    |
| <b>Q1D418</b> | serine/threonine protein kinase                                 | 0.03 | -    |
| <b>PYRB</b>   | aspartate carbamoyltransferase                                  | 0.09 | -    |
| <b>Q1D2U6</b> | adventurous gliding motility protein AglT                       | 0.06 | -    |
| <b>Q1DG46</b> | amidohydrolase                                                  | 0.04 | -    |
| <b>DEOD</b>   | purine nucleoside phosphorylase                                 | 0.13 | 0.13 |
| <b>PUR4</b>   | phosphoribosylformylglycinamide synthase                        | 0.03 | -    |
| <b>Q1CYZ7</b> | terpene synthase                                                | 0.04 | -    |
| <b>Q1CVY7</b> | oxidoreductase                                                  | 0.07 | -    |
| <b>Q1D4M7</b> | DofB                                                            | 0.15 | -    |
| <b>Q1CXA7</b> | peptidyl-prolyl cis-trans isomerase                             | 0.23 | -    |

|                |                                                     |      |      |
|----------------|-----------------------------------------------------|------|------|
| <b>Q1D3V9</b>  | phage tail protein                                  | 0.16 | 0.38 |
| <b>Q1D025</b>  | methyl transferase                                  | 0.03 | -    |
| <b>Q1CVM7</b>  | glycosyl transferase                                | 0.04 | -    |
| Q1DA70         | pirin family protein                                | 0.05 | -    |
| Q1D2V2         | adventurous gliding motility protein AgmX           | 0.04 | -    |
| <b>Q1D0H5</b>  | pyrimidine-nucleoside phosphorylase                 | 0.07 | -    |
| Q1D669         | biotin synthase                                     | 0.10 | -    |
| <b>Q1D7X4</b>  | aminomethyltransferase                              | 0.06 | -    |
| Q1D3H8         | L-aspartate oxidase                                 | 0.04 | -    |
| <b>Q1CXJ4</b>  | coproporphyrinogen oxidase                          | 0.06 | -    |
| <b>Q1DDY8</b>  | glutathione S transferase                           | 0.06 | -    |
| Q1D806         | adventurous gliding motility protein AgIU           | 0.04 | -    |
| Q1D689         | 2,3-dihydro-2,3-dihydroxybenzoate dehydrogenase     | 0.06 | -    |
| <b>Q1CZT4</b>  | acetyltransferase                                   | 0.15 | -    |
| Q1D4E6         | FAD-binding domain protein                          | 0.03 | -    |
| <b>A0A0H4X</b> |                                                     |      |      |
| <b>GT4</b>     | quorum sensing signal AsgA                          | 0.05 | -    |
| <b>Q1D4A1</b>  | bifunctional NAD(P)H-hydrate repair enzyme          | 0.03 | -    |
| Q1D9Y5         | glutathione-disulfide reductase                     | 0.03 | 0.05 |
| A0A0H4W        |                                                     |      |      |
| UN0            | peptidyl-prolyl cis-trans isomerase PpiA            | 0.02 | -    |
| <b>Q1D6L8</b>  | dihydroorotase                                      | 0.03 | -    |
| <b>Q1D2F6</b>  | decarboxylase family protein                        | 0.03 | 0.08 |
| PSD            | phosphatidylserine decarboxylase                    | 0.06 | -    |
| Q1CWP9         | myxobacterial hemagglutinin                         | 0.04 | 0.05 |
| <b>Q1D1B9</b>  | choloyleglycine hydrolase family protein            | 0.05 | -    |
| <b>Q1D965</b>  | HesB/YadR/YfhF family protein                       | 0.18 | -    |
| <b>Q1CYQ7</b>  | glycine cleavage system T protein                   | 0.04 | -    |
| <b>Q1DEX3</b>  | aminotransferase                                    | 0.03 | -    |
| <b>Q1D0V7</b>  | Inorganic pyrophosphatase                           | 0.06 | -    |
| <b>Q1D4F6</b>  | polyketide synthase                                 | 0.01 | -    |
| <b>Q1CXC7</b>  | late embryogenesis abundant-like protein            | 0.07 | -    |
| <b>Q1CVW0</b>  | vegetative protein                                  | 0.05 | -    |
| <b>Q1D5D1</b>  | pyridine nucleotide-disulphide oxidoreductase       | 0.03 | -    |
| <b>Q1D7W4</b>  | ferredoxin                                          | 0.17 | -    |
| <b>F8CEV8</b>  | pseudouridine synthase                              | 0.02 | -    |
| Q1D910         | peptidylprolyl isomerase                            | 0.03 | -    |
| <b>MGLA</b>    | gliding motility protein MglA                       | 0.07 | -    |
| <b>Q1DDR3</b>  | AMP-binding protein                                 | 0.02 | -    |
| Q1D7M7         | xanthine dehydrogenase                              | 0.01 | 0.03 |
| <b>Q1D559</b>  | glutathione S-transferase                           | 0.04 | -    |
| Q1D161         | male sterility protein-like protein                 | 0.03 | -    |
| <b>Q1D7K0</b>  | oxidoreductase                                      | 0.03 | -    |
| Q1DFD3         | endonuclease/exonuclease/phosphatase family protein | -    | 0.12 |
| <b>DESS</b>    | development-specific protein S                      | -    | 0.16 |
| <b>Q1DDX6</b>  | amidohydrolase                                      | -    | 0.01 |



|                         |                                                                        |      |      |
|-------------------------|------------------------------------------------------------------------|------|------|
| <b>Q1CWL6</b>           | S-(hydroxymethyl)glutathione dehydrogenase                             | -    | 0.04 |
| <b>Q1D3U9</b>           | phage tail protein                                                     | -    | 0.02 |
| <b>Q1D6W6</b>           | 3,4-dihydroxy-2-butanone 4-phosphate synthase/GTP<br>cyclohydrolase II | -    | 0.02 |
| <b>PNP</b>              | polyribonucleotide nucleotidyltransferase                              | -    | 0.03 |
| <b>Function unknown</b> |                                                                        |      |      |
| Q1DBN2                  |                                                                        | 0.28 | -    |
| Q1D2V4                  |                                                                        | 0.18 | 0.21 |
| Q1D5E0                  |                                                                        | 0.23 | -    |
| Q1D8Z5                  |                                                                        | 0.27 | 0.28 |
| Q1D2R6                  |                                                                        | 0.33 | 0.12 |
| Q1D2U5                  |                                                                        | 0.17 | -    |
| Q1CVR0                  |                                                                        | 0.18 | 0.14 |
| <b>Q1D1M5</b>           |                                                                        | 0.22 | 0.19 |
| <b>Q1CZV5</b>           |                                                                        | 0.13 | 0.03 |
| Q1D2E4                  |                                                                        | 0.23 | 0.16 |
| Q1D9N6                  |                                                                        | 0.09 | 0.06 |
| Q1CXK5                  |                                                                        | 0.29 | 0.13 |
| <b>Q1CZI8</b>           |                                                                        | 0.22 | -    |
| Q1CXW5                  |                                                                        | 0.14 | -    |
| Q1D077                  |                                                                        | 0.33 | 0.27 |
| Q1D9B3                  |                                                                        | 0.13 | -    |
| Q1D840                  |                                                                        | 0.05 | -    |
| Q1D6H7                  |                                                                        | 0.19 | 0.21 |
| Q1D5W5                  |                                                                        | 0.35 | -    |
| Q1D3G6                  |                                                                        | 0.15 | 0.04 |
| Q1D2V0                  |                                                                        | 0.14 | 0.05 |
| Q1D7L1                  |                                                                        | 0.06 | -    |
| Q1D2U9                  |                                                                        | 0.18 | 0.09 |
| Q1D4F5                  |                                                                        | 0.38 | 0.19 |
| Q1D959                  |                                                                        | 0.13 | 0.08 |
| Q1DEA6                  |                                                                        | 0.10 | -    |
| Q1D0J9                  |                                                                        | 0.29 | 0.21 |
| Q1D5R1                  |                                                                        | 0.13 | 0.10 |
| <b>Q1D9C8</b>           |                                                                        | 0.23 | -    |
| Q1CX67                  |                                                                        | 0.10 | -    |
| Q1CW98                  |                                                                        | 0.23 | 0.13 |
| Q1D0K0                  |                                                                        | 0.16 | 0.18 |
| <b>Q1D4U1</b>           |                                                                        | 0.15 | -    |
| Q1DBT9                  |                                                                        | 0.07 | 0.02 |
| Q1DDR7                  |                                                                        | 0.04 | 0.03 |
| Q1DEJ3                  |                                                                        | 0.29 | 0.29 |
| <b>Q1D4F9</b>           |                                                                        | 0.05 | -    |
| <b>Q1V0D2</b>           |                                                                        | 0.13 | -    |
| Q1CYL8                  |                                                                        | 0.08 | -    |
| Q1CX74                  |                                                                        | 0.24 | -    |

|               |      |      |
|---------------|------|------|
| <b>Q1D3V0</b> | 0.07 | 0.08 |
| <b>Q1DFZ6</b> | 0.05 | -    |
| <b>Q1DC42</b> | 0.07 | -    |
| <b>Q1D6G2</b> | 0.08 | 0.01 |
| <b>Q1D9T8</b> | 0.08 | 0.09 |
| <b>Q1DEJ8</b> | 0.08 | 0.03 |
| Q1D9B5        | 0.07 | 0.07 |
| Q1CWJ8        | 0.05 | -    |
| Q1D4R8        | 0.06 | -    |
| Q1DA21        | 0.24 | -    |
| <b>Q1DFS2</b> | 0.08 | -    |
| <b>Q1D9J1</b> | 0.10 | -    |
| <b>Q1D1K3</b> | 0.05 | -    |
| Q1D904        | 0.25 | -    |
| Q1D0U7        | 0.08 | -    |
| <b>Q1D3U7</b> | 0.06 | 0.11 |
| Q1D8D6        | 0.02 | 0.04 |
| Q1DET2        | 0.09 | -    |
| Q1DCJ4        | 0.13 | 0.11 |
| <b>Q1DBX9</b> | 0.07 | -    |
| Q1DDY7        | 0.12 | -    |
| <b>Q1DEJ9</b> | 0.04 | -    |
| Q1D9M7        | 0.05 | 0.08 |
| Q1D5D6        | 0.06 | -    |
| <b>Q1D3A5</b> | 0.09 | -    |
| <b>Q1DF90</b> | 0.13 | -    |
| Q1D0E8        | 0.08 | -    |
| Q1D450        | 0.14 | 0.09 |
| <b>Q1D2W3</b> | 0.05 | 0.08 |
| <b>Q1D9I8</b> | 0.06 | -    |
| <b>Q1CVW3</b> | 0.12 | -    |
| Q1CYX4        | 0.02 | 0.05 |
| Q1CZ57        | 0.05 | -    |
| Q1CWY2        | 0.07 | -    |
| Q1DCE2        | 0.08 | -    |
| Q1CXT3        | 0.07 | -    |
| Q1D1Q5        | 0.06 | -    |
| <b>Q1D3U8</b> | 0.06 | 0.06 |
| <b>Q1DDX9</b> | 0.11 | -    |
| Q1CZ58        | 0.04 | -    |
| <b>Q1CZF4</b> | 0.12 | -    |
| Q1D615        | 0.08 | -    |
| Q1DEF2        | 0.11 | -    |
| Q1D2J1        | 0.06 | -    |
| Q1D100        | 0.06 | -    |
| <b>Q1DCA5</b> | 0.12 | -    |

|               |      |      |
|---------------|------|------|
| <b>Q1D417</b> | 0.03 | -    |
| <b>Q1DBU4</b> | 0.08 | -    |
| Q1CZ63        | 0.02 | -    |
| <b>Q1D4R1</b> | 0.02 | -    |
| <b>Q1DFH8</b> | 0.06 | -    |
| Q1D4H9        | 0.08 | -    |
| Q1DD93        | 0.02 | -    |
| Q1CYW3        | 0.03 | -    |
| <b>Q1D1C2</b> | 0.03 | -    |
| Q1DB38        | 0.08 | -    |
| <b>Q1D4U3</b> | 0.02 | -    |
| Q1CVK8        | 0.14 | 0.23 |
| Q1D2D5        | 0.09 | -    |
| <b>Q1D6J5</b> | 0.05 | -    |
| Q1D992        | 0.05 | -    |
| <b>Q1DAD6</b> | 0.05 | -    |
| <b>Q1CZF7</b> | 0.05 | -    |
| <b>Q1D8H6</b> | 0.08 | -    |
| <b>Q1D8C0</b> | 0.02 | -    |
| Q1CZ50        | 0.01 | -    |
| Q1D1D7        | 0.02 | -    |
| Q1D680        | -    | 0.12 |
| <b>Q1D3V8</b> | -    | 0.06 |
| Q1CXB7        | -    | 0.11 |
| <b>Q1DA09</b> | -    | 0.07 |
| Q1DDQ6        | -    | 0.03 |
| Q1CX13        | -    | 0.06 |
| Q1CVF7        | -    | 0.01 |

<sup>a</sup> Data are the mean of two replicates.

<sup>b</sup> Proteins in bold characters have a predicted intracellular localization.

<sup>c</sup> Protein not detected or protein identification not considered valid.
